# Supplementary material
Source: publisher figshare collection journal article supplement (https://acs.figshare.com/ndownloader/files/4745791)
Supplement: Supplementary file 1 [file 4745791]

data_Complex3
#------------------------------------------------------------------------------
_audit_creation_date                  'Mon Feb  5 13:37:10 2002'
_audit_creation_method                'from TEXRAY.INF file'
_audit_update_record                   ?
#------------------------------------------------------------------------------
_computing_data_collection            'Rigaku/AFC Diffractometer Control'
_computing_cell_refinement            'Rigaku/AFC Diffractometer Control'
_computing_data_reduction             'teXsan'
_computing_structure_solution          ?
_computing_structure_refinement       'teXsan'
_computing_publication_material       'teXsan'
_computing_molecular_graphics          ?
#------------------------------------------------------------------------------
_chemical_compound_source              ?
_chemical_name_common                  ?
_chemical_formula_weight               650.83
_chemical_formula_analytical           ?
_chemical_formula_sum                  'C32 H44 Cl2 N2 O2 Zr '
_chemical_formula_moiety               'C32 H44 Cl2 N2 O2 Zr '
_chemical_formula_structural           ?
_chemical_melting_point                ?
#------------------------------------------------------------------------------
_cell_length_a                         25.502(3)
_cell_length_b                         7.851(1)
_cell_length_c                         16.882(3)
_cell_angle_alpha                      90
_cell_angle_beta                       102.40(1)
_cell_angle_gamma                      90
_cell_volume                           3301.3(8)
_cell_formula_units_Z                  4
_cell_measurement_temperature          223
_cell_measurement_reflns_used          25
_cell_measurement_theta_min            15.0
_cell_measurement_theta_max            17.5
#------------------------------------------------------------------------------
_symmetry_cell_setting                 monoclinic
_symmetry_space_group_name_H-M        'C 2/c        '
_symmetry_Int_Tables_number            15
_symmetry_space_group_name_Hall        ?
loop_
_symmetry_equiv_pos_as_xyz
x,y,z
-x,y,1/2-z
-x,-y,-z
x,-y,1/2+z
1/2+x,1/2+y,z
1/2-x,1/2+y,1/2-z
1/2-x,1/2-y,-z
1/2+x,1/2-y,1/2+z
#------------------------------------------------------------------------------
_exptl_crystal_description            'prismatic'
_exptl_crystal_colour                 'yellow'
_exptl_crystal_size_max                0.450
_exptl_crystal_size_mid                0.400
_exptl_crystal_size_min                0.300
_exptl_crystal_density_diffrn          1.309
_exptl_crystal_density_method         'not measured'
_exptl_crystal_F_000                   1584.00
_exptl_absorpt_coefficient_mu          0.524
_exptl_absorpt_correction_type         psi-scan
_exptl_absorpt_process_details        '(North, Phillips & Mathews, 1968)'
_exptl_absorpt_correction_T_min        0.883
_exptl_absorpt_correction_T_max        0.999
_exptl_special_details
;
 ?
;
#------------------------------------------------------------------------------
_diffrn_special_details
;
 ?
;
_diffrn_ambient_temperature            223
_diffrn_radiation_wavelength           0.7107
_diffrn_radiation_type                'Mo K\a'
_diffrn_radiation_source              'Rigaku rotating anode'
_diffrn_radiation_monochromator        graphite
_diffrn_radiation_detector            'scintillation counter'
_diffrn_measurement_device_type       'Rigaku AFC7R'
_diffrn_measurement_method             \w
_diffrn_measured_fraction_theta_full  27.50

_diffrn_standards_number              3
_diffrn_standards_interval_count      150
_diffrn_standards_decay_%             0.29
loop_
_diffrn_standard_refln_index_h
_diffrn_standard_refln_index_k
_diffrn_standard_refln_index_l
     -4       0      2
     -5       1      1
     -5       1     -1
_diffrn_reflns_number                  4483
_reflns_number_total                   3785
_reflns_number_gt                      3368
_reflns_observed_expression             >2.0sigma(I)
_diffrn_reflns_av_R_equivalents        0.009
_diffrn_reflns_av_sigmaI/netI          0.021
_diffrn_reflns_limit_h_min             -18
_diffrn_reflns_limit_h_max             32
_diffrn_reflns_limit_k_min             0
_diffrn_reflns_limit_k_max             10
_diffrn_reflns_limit_l_min             -21
_diffrn_reflns_limit_l_max             21
_diffrn_reflns_theta_min               2.65
_diffrn_reflns_theta_max               27.50
_diffrn_reflns_theta_full              27.50

_diffrn_reflns_reduction_process      'Lp corrections applied'
_diffrn_orient_matrix_UB_11           -0.02939
_diffrn_orient_matrix_UB_12            0.01992
_diffrn_orient_matrix_UB_13            0.02974
_diffrn_orient_matrix_UB_21            0.02598
_diffrn_orient_matrix_UB_22           -0.01834
_diffrn_orient_matrix_UB_23            0.05277
_diffrn_orient_matrix_UB_31            0.00854
_diffrn_orient_matrix_UB_32            0.12444
_diffrn_orient_matrix_UB_33            0.00302
#------------------------------------------------------------------------------
loop_
_atom_type_symbol
_atom_type_description
_atom_type_scat_dispersion_real
_atom_type_scat_imag
_atom_type_scat_source
  'C'  'C'   0.003 0.002 
;International Tables for Crystallography
(1992, Vol. C, Tables 4.2.6.8 and 6.1.1.1)
;
  'H'  'H'   0.000 0.000 
;International Tables for Crystallography
(1992, Vol. C, Table 6.1.1.2)
;
  'N'  'N'   0.006 0.003 
;International Tables for Crystallography
(1992, Vol. C, Tables 4.2.6.8 and 6.1.1.1)
;
  'O'  'O'   0.011 0.006 
;International Tables for Crystallography
(1992, Vol. C, Tables 4.2.6.8 and 6.1.1.1)
;
  'Zr' 'Zr'   -2.967 0.560 
;International Tables for Crystallography
(1992, Vol. C, Tables 4.2.6.8 and 6.1.1.1)
;
  'Cl' 'Cl'   0.148 0.159 
;International Tables for Crystallography
(1992, Vol. C, Tables 4.2.6.8 and 6.1.1.1)
;
#------------------------------------------------------------------------------
loop_
_atom_site_label
_atom_site_type_symbol
_atom_site_fract_x
_atom_site_fract_y
_atom_site_fract_z
_atom_site_U_iso_or_equiv
_atom_site_adp_type
_atom_site_occupancy
_atom_site_calc_flags
_atom_site_refinement_flags
_atom_site_disorder_assembly
_atom_site_disorder_group
 Zr(1)  Zr 0.0000      0.16143(3)  0.7500      0.02457(6)  Uani 1.00 d S . .
 Cl(1)  Cl 0.03687(3)  0.35909(8)  0.85849(4)  0.0490(2)   Uani 1.00 d . . .
 O(1)   O  0.06950(5)  0.1308(2)   0.71696(8)  0.0288(3)   Uani 1.00 d . . .
 N(1)   N  -0.02049(6) -0.0575(2)  0.65354(10) 0.0288(4)   Uani 1.00 d . . .
 C(1)   C  0.01230(8)  -0.1201(3)  0.6129(1)   0.0331(5)   Uani 1.00 d . . .
 C(2)   C  0.17329(8)  -0.0068(3)  0.6151(1)   0.0329(5)   Uani 1.00 d . . .
 C(3)   C  0.09537(7)  0.0506(2)   0.6671(1)   0.0267(4)   Uani 1.00 d . . .
 C(4)   C  0.17579(8)  0.2529(3)   0.7080(1)   0.0343(5)   Uani 1.00 d . . .
 C(5)   C  0.09569(8)  -0.1766(3)  0.5698(1)   0.0357(5)   Uani 1.00 d . . .
 C(6)   C  0.06859(8)  -0.0808(3)  0.6185(1)   0.0304(5)   Uani 1.00 d . . .
 C(7)   C  0.1423(1)   0.4116(3)   0.6781(2)   0.0479(7)   Uani 1.00 d . . .
 C(8)   C  -0.09682(9) -0.2376(3)  0.5578(1)   0.0377(5)   Uani 1.00 d . . .
 C(9)   C  0.14857(8)  -0.1440(3)  0.5692(1)   0.0355(5)   Uani 1.00 d . . .
 C(10)  C  0.14849(7)  0.0955(2)   0.6635(1)   0.0283(4)   Uani 1.00 d . . .
 C(11)  C  -0.1041(1)  -0.2211(4)  0.6812(2)   0.0565(8)   Uani 1.00 d . . .
 C(12)  C  -0.07748(8) -0.1093(3)  0.6270(1)   0.0372(5)   Uani 1.00 d . . .
 C(13)  C  0.1786(1)   -0.2497(4)  0.5195(2)   0.0504(7)   Uani 1.00 d . . .
 C(14)  C  0.23216(10) 0.2791(4)   0.6917(2)   0.0512(7)   Uani 1.00 d . . .
 C(15)  C  0.18141(10) 0.2356(4)   0.7998(1)   0.0443(6)   Uani 1.00 d . . .
 C(16)  C  -0.1401(1)  -0.2903(4)  0.6029(2)   0.0581(8)   Uani 1.00 d . . .
 H(1)   H  0.2081(8)   0.019(3)    0.610(1)    0.0293      Uiso 1.00 calc . . .
 H(2)   H  0.0778(8)   -0.267(3)   0.538(1)    0.0293      Uiso 1.00 calc . . .
 H(3)   H  -0.0015(8)  -0.201(3)   0.573(1)    0.0293      Uiso 1.00 calc . . .
 H(4)   H  0.2558(8)   0.187(3)    0.708(1)    0.0293      Uiso 1.00 calc . . .
 H(5)   H  0.2309(8)   0.300(3)    0.635(1)    0.0293      Uiso 1.00 calc . . .
 H(6)   H  0.2471(8)   0.377(3)    0.721(1)    0.0293      Uiso 1.00 calc . . .
 H(7)   H  0.1403(8)   0.427(3)    0.627(1)    0.0293      Uiso 1.00 calc . . .
 H(8)   H  0.1037(8)   0.409(3)    0.687(1)    0.0293      Uiso 1.00 calc . . .
 H(9)   H  0.1585(8)   0.505(3)    0.703(1)    0.0293      Uiso 1.00 calc . . .
 H(10)  H  0.2010(8)   0.330(3)    0.828(1)    0.0293      Uiso 1.00 calc . . .
 H(11)  H  0.2013(8)   0.144(3)    0.820(1)    0.0293      Uiso 1.00 calc . . .
 H(12)  H  0.1475(9)   0.231(3)    0.816(1)    0.0293      Uiso 1.00 calc . . .
 H(13)  H  -0.0765(8)  -0.309(3)   0.708(1)    0.0293      Uiso 1.00 calc . . .
 H(14)  H  -0.1223(8)  -0.171(3)   0.719(1)    0.0293      Uiso 1.00 calc . . .
 H(15)  H  -0.1493(8)  -0.409(3)   0.603(1)    0.0293      Uiso 1.00 calc . . .
 H(16)  H  -0.1713(9)  -0.225(3)   0.585(1)    0.0293      Uiso 1.00 calc . . .
 H(17)  H  -0.1060(8)  -0.191(3)   0.505(1)    0.0293      Uiso 1.00 calc . . .
 H(18)  H  -0.0720(8)  -0.330(3)   0.557(1)    0.0293      Uiso 1.00 calc . . .
 H(19)  H  -0.1018(8)  -0.009(3)   0.619(1)    0.0293      Uiso 1.00 calc . . .
 H(20)  H  0.1979(8)   -0.179(3)   0.491(1)    0.0293      Uiso 1.00 calc . . .
 H(21)  H  0.2038(9)   -0.315(3)   0.551(1)    0.0293      Uiso 1.00 calc . . .
 H(22)  H  0.1575(8)   -0.315(3)   0.482(1)    0.0293      Uiso 1.00 calc . . .

loop_
_atom_site_aniso_label
_atom_site_aniso_U_11
_atom_site_aniso_U_22
_atom_site_aniso_U_33
_atom_site_aniso_U_12
_atom_site_aniso_U_13
_atom_site_aniso_U_23
 Zr(1)  0.0262(1)   0.0212(1)   0.0284(1)   0.0000      0.01046(9)  0.0000     
 Cl(1)  0.0572(3)   0.0398(3)   0.0502(3)   -0.0104(3)  0.0119(3)   -0.0181(3) 
 O(1)   0.0275(6)   0.0282(7)   0.0335(7)   -0.0021(5)  0.0126(5)   -0.0036(5) 
 N(1)   0.0266(8)   0.0267(8)   0.0339(8)   -0.0020(6)  0.0084(6)   -0.0017(6) 
 C(1)   0.0335(10)  0.031(1)    0.036(1)    -0.0036(8)  0.0087(8)   -0.0079(8) 
 C(2)   0.0270(9)   0.041(1)    0.0325(10)  0.0051(8)   0.0105(8)   0.0053(8)  
 C(3)   0.0288(9)   0.0275(9)   0.0257(8)   0.0031(7)   0.0102(7)   0.0023(7)  
 C(4)   0.0285(9)   0.034(1)    0.042(1)    -0.0034(8)  0.0114(8)   -0.0007(9) 
 C(5)   0.038(1)    0.038(1)    0.0327(10)  0.0018(9)   0.0105(8)   -0.0070(9) 
 C(6)   0.0307(9)   0.0321(10)  0.0301(9)   0.0011(8)   0.0103(8)   -0.0025(8) 
 C(7)   0.050(1)    0.031(1)    0.064(2)    -0.004(1)   0.014(1)    0.004(1)   
 C(8)   0.037(1)    0.037(1)    0.036(1)    -0.0043(9)  0.0011(9)   -0.0016(9) 
 C(9)   0.0359(10)  0.042(1)    0.0311(9)   0.0090(9)   0.0122(8)   -0.0006(9) 
 C(10)  0.0276(9)   0.0312(9)   0.0269(9)   0.0019(7)   0.0080(7)   0.0046(8)  
 C(11)  0.058(2)    0.061(2)    0.059(2)    -0.027(1)   0.032(1)    -0.024(1)  
 C(12)  0.0295(10)  0.032(1)    0.050(1)    -0.0026(8)  0.0092(9)   -0.0094(9) 
 C(13)  0.044(1)    0.064(2)    0.048(1)    0.011(1)    0.019(1)    -0.013(1)  
 C(14)  0.036(1)    0.054(2)    0.068(2)    -0.012(1)   0.021(1)    -0.009(1)  
 C(15)  0.038(1)    0.052(1)    0.041(1)    -0.006(1)   0.0050(10)  -0.009(1)  
 C(16)  0.043(1)    0.057(2)    0.078(2)    -0.021(1)   0.022(1)    -0.029(1)  
#------------------------------------------------------------------------------
_refine_special_details
;
Refinement based on F against all reflections. The weighted R-factor (wR) and
goodness of fit (S) are based on F, conventional R-factors (R) are calculated
on F, with F set to zero for negative F. The threshold expression of
F^2^ > 2sigma(F^2^) is used only for calculating R-factors(gt) etc. thus the
refinement was done using all reflections.  
;

_refine_ls_structure_factor_coef       F
_refine_ls_matrix_type                 full
_refine_ls_weighting_scheme            sigma
_refine_ls_hydrogen_treatment          refxyz
_refine_ls_extinction_method           none
_refine_ls_extinction_coef             ?
_refine_ls_abs_structure_details       ?
_refine_ls_abs_structure_Flack         ?
_refine_ls_number_reflns               3368
_refine_ls_number_parameters           243
_refine_ls_number_restraints           0
_refine_ls_number_constraints          0
_refine_ls_R_factor_all                0.0286
_refine_ls_R_factor_gt                 0.0286
_refine_ls_wR_factor_all               ?
_refine_ls_wR_factor_ref               0.0292
_refine_ls_wR_factor_gt                0.0292
_refine_ls_goodness_of_fit_all         ?
_refine_ls_goodness_of_fit_ref         1.897
_refine_ls_shift/su_max                0.0020
_refine_ls_shift/su_mean               0.0000
_refine_diff_density_min               -0.28
_refine_diff_density_max               0.56
#------------------------------------------------------------------------------
_geom_special_details
;
 ?
;
loop_
_geom_bond_atom_site_label_1
_geom_bond_atom_site_label_2
_geom_bond_distance
_geom_bond_site_symmetry_1
_geom_bond_site_symmetry_2
_geom_bond_publ_flag
 Zr(1)     Cl(1)     2.4305(6)  1_555 1_555 yes
 Zr(1)     Cl(1)     2.4305(6)  1_555 2_556 yes
 Zr(1)     O(1)      1.984(1)   1_555 1_555 yes
 Zr(1)     O(1)      1.984(1)   1_555 2_556 yes
 Zr(1)     N(1)      2.348(2)   1_555 1_555 yes
 Zr(1)     N(1)      2.348(2)   1_555 2_556 yes
 O(1)      C(3)      1.334(2)   1_555 1_555 yes
 N(1)      C(1)      1.288(2)   1_555 1_555 yes
 N(1)      C(12)     1.483(2)   1_555 1_555 yes
 C(1)      C(6)      1.452(3)   1_555 1_555 yes
 C(1)      H(3)      0.94(2)    1_555 1_555 no
 C(2)      C(9)      1.395(3)   1_555 1_555 yes
 C(2)      C(10)     1.391(3)   1_555 1_555 yes
 C(2)      H(1)      0.93(2)    1_555 1_555 no
 C(3)      C(6)      1.401(3)   1_555 1_555 yes
 C(3)      C(10)     1.414(2)   1_555 1_555 yes
 C(4)      C(7)      1.535(3)   1_555 1_555 yes
 C(4)      C(10)     1.533(3)   1_555 1_555 yes
 C(4)      C(14)     1.535(3)   1_555 1_555 yes
 C(4)      C(15)     1.531(3)   1_555 1_555 yes
 C(5)      C(6)      1.401(3)   1_555 1_555 yes
 C(5)      C(9)      1.375(3)   1_555 1_555 yes
 C(5)      H(2)      0.95(2)    1_555 1_555 no
 C(7)      H(7)      0.86(2)    1_555 1_555 no
 C(7)      H(8)      1.02(2)    1_555 1_555 no
 C(7)      H(9)      0.90(2)    1_555 1_555 no
 C(8)      C(12)     1.542(3)   1_555 1_555 yes
 C(8)      C(16)     1.527(3)   1_555 1_555 yes
 C(8)      H(17)     0.94(2)    1_555 1_555 no
 C(8)      H(18)     0.96(2)    1_555 1_555 no
 C(9)      C(13)     1.502(3)   1_555 1_555 yes
 C(11)     C(12)     1.528(3)   1_555 1_555 yes
 C(11)     C(16)     1.537(4)   1_555 1_555 yes
 C(11)     H(13)     1.02(2)    1_555 1_555 no
 C(11)     H(14)     0.95(2)    1_555 1_555 no
 C(12)     H(19)     0.99(2)    1_555 1_555 no
 C(13)     H(20)     0.94(2)    1_555 1_555 no
 C(13)     H(21)     0.90(2)    1_555 1_555 no
 C(13)     H(22)     0.90(2)    1_555 1_555 no
 C(14)     H(4)      0.94(2)    1_555 1_555 no
 C(14)     H(5)      0.97(2)    1_555 1_555 no
 C(14)     H(6)      0.95(2)    1_555 1_555 no
 C(15)     H(10)     0.96(2)    1_555 1_555 no
 C(15)     H(11)     0.91(2)    1_555 1_555 no
 C(15)     H(12)     0.96(2)    1_555 1_555 no
 C(16)     H(15)     0.96(2)    1_555 1_555 no
 C(16)     H(16)     0.94(2)    1_555 1_555 no
#------------------------------------------------------------------------------
loop_
_geom_angle_atom_site_label_1
_geom_angle_atom_site_label_2
_geom_angle_atom_site_label_3
_geom_angle
_geom_angle_site_symmetry_1
_geom_angle_site_symmetry_2
_geom_angle_site_symmetry_3
_geom_angle_publ_flag
   Cl(1)     Zr(1)     Cl(1)     100.64(3)  1_555 1_555 2_556 yes
   Cl(1)     Zr(1)     O(1)      93.71(4)   1_555 1_555 1_555 yes
   Cl(1)     Zr(1)     O(1)      95.15(4)   1_555 1_555 2_556 yes
   Cl(1)     Zr(1)     N(1)      169.25(4)  1_555 1_555 1_555 yes
   Cl(1)     Zr(1)     N(1)      87.26(4)   1_555 1_555 2_556 yes
   Cl(1)     Zr(1)     O(1)      95.15(4)   2_556 1_555 1_555 yes
   Cl(1)     Zr(1)     O(1)      93.71(4)   2_556 1_555 2_556 yes
   Cl(1)     Zr(1)     N(1)      87.26(4)   2_556 1_555 1_555 yes
   Cl(1)     Zr(1)     N(1)      169.25(4)  2_556 1_555 2_556 yes
   O(1)      Zr(1)     O(1)      166.10(8)  1_555 1_555 2_556 yes
   O(1)      Zr(1)     N(1)      78.20(5)   1_555 1_555 1_555 yes
   O(1)      Zr(1)     N(1)      91.56(5)   1_555 1_555 2_556 yes
   O(1)      Zr(1)     N(1)      91.56(5)   2_556 1_555 1_555 yes
   O(1)      Zr(1)     N(1)      78.20(5)   2_556 1_555 2_556 yes
   N(1)      Zr(1)     N(1)      85.90(8)   1_555 1_555 2_556 yes
   Zr(1)     O(1)      C(3)      145.8(1)   1_555 1_555 1_555 yes
   Zr(1)     N(1)      C(1)      125.2(1)   1_555 1_555 1_555 yes
   Zr(1)     N(1)      C(12)     117.9(1)   1_555 1_555 1_555 yes
   C(1)      N(1)      C(12)     116.1(2)   1_555 1_555 1_555 yes
   N(1)      C(1)      C(6)      129.1(2)   1_555 1_555 1_555 yes
   N(1)      C(1)      H(3)      117(1)     1_555 1_555 1_555 no
   C(6)      C(1)      H(3)      113(1)     1_555 1_555 1_555 no
   C(9)      C(2)      C(10)     124.3(2)   1_555 1_555 1_555 yes
   C(9)      C(2)      H(1)      116(1)     1_555 1_555 1_555 no
   C(10)     C(2)      H(1)      119(1)     1_555 1_555 1_555 no
   O(1)      C(3)      C(6)      118.2(2)   1_555 1_555 1_555 yes
   O(1)      C(3)      C(10)     121.2(2)   1_555 1_555 1_555 yes
   C(6)      C(3)      C(10)     120.6(2)   1_555 1_555 1_555 yes
   C(7)      C(4)      C(10)     109.4(2)   1_555 1_555 1_555 yes
   C(7)      C(4)      C(14)     108.0(2)   1_555 1_555 1_555 yes
   C(7)      C(4)      C(15)     109.2(2)   1_555 1_555 1_555 yes
   C(10)     C(4)      C(14)     111.4(2)   1_555 1_555 1_555 yes
   C(10)     C(4)      C(15)     111.0(2)   1_555 1_555 1_555 yes
   C(14)     C(4)      C(15)     107.8(2)   1_555 1_555 1_555 yes
   C(6)      C(5)      C(9)      120.8(2)   1_555 1_555 1_555 yes
   C(6)      C(5)      H(2)      119(1)     1_555 1_555 1_555 no
   C(9)      C(5)      H(2)      119(1)     1_555 1_555 1_555 no
   C(1)      C(6)      C(3)      123.1(2)   1_555 1_555 1_555 yes
   C(1)      C(6)      C(5)      117.0(2)   1_555 1_555 1_555 yes
   C(3)      C(6)      C(5)      119.9(2)   1_555 1_555 1_555 yes
   C(4)      C(7)      H(7)      110(1)     1_555 1_555 1_555 no
   C(4)      C(7)      H(8)      115(1)     1_555 1_555 1_555 no
   C(4)      C(7)      H(9)      109(1)     1_555 1_555 1_555 no
   H(7)      C(7)      H(8)      106(1)     1_555 1_555 1_555 no
   H(7)      C(7)      H(9)      106(1)     1_555 1_555 1_555 no
   H(8)      C(7)      H(9)      108(1)     1_555 1_555 1_555 no
   C(12)     C(8)      C(16)     86.9(2)    1_555 1_555 1_555 yes
   C(12)     C(8)      H(17)     115(1)     1_555 1_555 1_555 no
   C(12)     C(8)      H(18)     113(1)     1_555 1_555 1_555 no
   C(16)     C(8)      H(17)     121(1)     1_555 1_555 1_555 no
   C(16)     C(8)      H(18)     110(1)     1_555 1_555 1_555 no
   H(17)     C(8)      H(18)     108(1)     1_555 1_555 1_555 no
   C(2)      C(9)      C(5)      117.8(2)   1_555 1_555 1_555 yes
   C(2)      C(9)      C(13)     120.9(2)   1_555 1_555 1_555 yes
   C(5)      C(9)      C(13)     121.3(2)   1_555 1_555 1_555 yes
   C(2)      C(10)     C(3)      116.2(2)   1_555 1_555 1_555 yes
   C(2)      C(10)     C(4)      122.5(2)   1_555 1_555 1_555 yes
   C(3)      C(10)     C(4)      121.2(2)   1_555 1_555 1_555 yes
   C(12)     C(11)     C(16)     87.1(2)    1_555 1_555 1_555 yes
   C(12)     C(11)     H(13)     107(1)     1_555 1_555 1_555 no
   C(12)     C(11)     H(14)     120(1)     1_555 1_555 1_555 no
   C(16)     C(11)     H(13)     111(1)     1_555 1_555 1_555 no
   C(16)     C(11)     H(14)     115(1)     1_555 1_555 1_555 no
   H(13)     C(11)     H(14)     111(1)     1_555 1_555 1_555 no
   N(1)      C(12)     C(8)      122.8(2)   1_555 1_555 1_555 yes
   N(1)      C(12)     C(11)     120.7(2)   1_555 1_555 1_555 yes
   N(1)      C(12)     H(19)     111(1)     1_555 1_555 1_555 no
   C(8)      C(12)     C(11)     88.1(2)    1_555 1_555 1_555 yes
   C(8)      C(12)     H(19)     108(1)     1_555 1_555 1_555 no
   C(11)     C(12)     H(19)     101(1)     1_555 1_555 1_555 no
   C(9)      C(13)     H(20)     110(1)     1_555 1_555 1_555 no
   C(9)      C(13)     H(21)     111(1)     1_555 1_555 1_555 no
   C(9)      C(13)     H(22)     114(1)     1_555 1_555 1_555 no
   H(20)     C(13)     H(21)     104(1)     1_555 1_555 1_555 no
   H(20)     C(13)     H(22)     105(1)     1_555 1_555 1_555 no
   H(21)     C(13)     H(22)     109(1)     1_555 1_555 1_555 no
   C(4)      C(14)     H(4)      114(1)     1_555 1_555 1_555 no
   C(4)      C(14)     H(5)      111(1)     1_555 1_555 1_555 no
   C(4)      C(14)     H(6)      107(1)     1_555 1_555 1_555 no
   H(4)      C(14)     H(5)      107(1)     1_555 1_555 1_555 no
   H(4)      C(14)     H(6)      107(1)     1_555 1_555 1_555 no
   H(5)      C(14)     H(6)      107(1)     1_555 1_555 1_555 no
   C(4)      C(15)     H(10)     110(1)     1_555 1_555 1_555 no
   C(4)      C(15)     H(11)     111(1)     1_555 1_555 1_555 no
   C(4)      C(15)     H(12)     113(1)     1_555 1_555 1_555 no
   H(10)     C(15)     H(11)     104(1)     1_555 1_555 1_555 no
   H(10)     C(15)     H(12)     106(1)     1_555 1_555 1_555 no
   H(11)     C(15)     H(12)     109(1)     1_555 1_555 1_555 no
   C(8)      C(16)     C(11)     88.3(2)    1_555 1_555 1_555 yes
   C(8)      C(16)     H(15)     117(1)     1_555 1_555 1_555 no
   C(8)      C(16)     H(16)     110(1)     1_555 1_555 1_555 no
   C(11)     C(16)     H(15)     116(1)     1_555 1_555 1_555 no
   C(11)     C(16)     H(16)     113(1)     1_555 1_555 1_555 no
   H(15)     C(16)     H(16)     109(1)     1_555 1_555 1_555 no
#------------------------------------------------------------------------------
loop_
_geom_torsion_atom_site_label_1
_geom_torsion_atom_site_label_2
_geom_torsion_atom_site_label_3
_geom_torsion_atom_site_label_4
_geom_torsion
_geom_torsion_site_symmetry_1
_geom_torsion_site_symmetry_2
_geom_torsion_site_symmetry_3
_geom_torsion_site_symmetry_4
_geom_torsion_publ_flag
   Zr(1)   O(1)    C(3)    C(6)    -8.3(3)  1_555 1_555 1_555 1_555 yes
   Zr(1)   O(1)    C(3)    C(10)   172.1(1) 1_555 1_555 1_555 1_555 yes
   Zr(1)   O(1)    C(3)    C(6)    -8.3(3)  1_555 2_556 2_556 2_556 yes
   Zr(1)   O(1)    C(3)    C(10)   172.1(1) 1_555 2_556 2_556 2_556 yes
   Zr(1)   N(1)    C(1)    C(6)    3.5(3)   1_555 1_555 1_555 1_555 yes
   Zr(1)   N(1)    C(12)   C(8)    173.4(2) 1_555 1_555 1_555 1_555 yes
   Zr(1)   N(1)    C(12)   C(11)   -76.9(2) 1_555 1_555 1_555 1_555 yes
   Zr(1)   N(1)    C(1)    C(6)    3.5(3)   1_555 2_556 2_556 2_556 yes
   Zr(1)   N(1)    C(12)   C(8)    173.4(2) 1_555 2_556 2_556 2_556 yes
   Zr(1)   N(1)    C(12)   C(11)   -76.9(2) 1_555 2_556 2_556 2_556 yes
   Cl(1)   Zr(1)   O(1)    C(3)    177.6(2) 1_555 1_555 1_555 1_555 yes
   Cl(1)   Zr(1)   O(1)    C(3)    -81.3(2) 1_555 1_555 2_556 2_556 yes
   Cl(1)   Zr(1)   N(1)    C(1)    -43.4(3) 1_555 1_555 1_555 1_555 yes
   Cl(1)   Zr(1)   N(1)    C(12)   147.1(2) 1_555 1_555 1_555 1_555 yes
   Cl(1)   Zr(1)   N(1)    C(1)    94.2(2)  1_555 1_555 2_556 2_556 yes
   Cl(1)   Zr(1)   N(1)    C(12)   -75.2(1) 1_555 1_555 2_556 2_556 yes
   O(1)    Zr(1)   O(1)    C(3)    48.1(2)  1_555 1_555 2_556 2_556 yes
   O(1)    Zr(1)   N(1)    C(1)    -1.6(2)  1_555 1_555 1_555 1_555 yes
   O(1)    Zr(1)   N(1)    C(12)   -171.0(1) 1_555 1_555 1_555 1_555 yes
   O(1)    Zr(1)   N(1)    C(1)    -172.1(2) 1_555 1_555 2_556 2_556 yes
   O(1)    Zr(1)   N(1)    C(12)   18.4(1)  1_555 1_555 2_556 2_556 yes
   O(1)    C(3)    C(6)    C(1)    7.4(3)   1_555 1_555 1_555 1_555 yes
   O(1)    C(3)    C(6)    C(5)    -175.3(2) 1_555 1_555 1_555 1_555 yes
   O(1)    C(3)    C(10)   C(2)    174.2(2) 1_555 1_555 1_555 1_555 yes
   O(1)    C(3)    C(10)   C(4)    -8.3(3)  1_555 1_555 1_555 1_555 yes
   N(1)    Zr(1)   O(1)    C(3)    4.8(2)   1_555 1_555 1_555 1_555 yes
   N(1)    Zr(1)   O(1)    C(3)    90.3(2)  1_555 1_555 2_556 2_556 yes
   N(1)    Zr(1)   N(1)    C(1)    -94.1(2) 1_555 1_555 2_556 2_556 yes
   N(1)    Zr(1)   N(1)    C(12)   96.5(1)  1_555 1_555 2_556 2_556 yes
   N(1)    C(1)    C(6)    C(3)    -6.4(3)  1_555 1_555 1_555 1_555 yes
   N(1)    C(1)    C(6)    C(5)    176.2(2) 1_555 1_555 1_555 1_555 yes
   N(1)    C(12)   C(8)    C(16)   149.0(2) 1_555 1_555 1_555 1_555 yes
   N(1)    C(12)   C(11)   C(16)   -150.6(2) 1_555 1_555 1_555 1_555 yes
   C(1)    N(1)    C(12)   C(8)    3.0(3)   1_555 1_555 1_555 1_555 yes
   C(1)    N(1)    C(12)   C(11)   112.7(2) 1_555 1_555 1_555 1_555 yes
   C(1)    C(6)    C(3)    C(10)   -173.0(2) 1_555 1_555 1_555 1_555 yes
   C(1)    C(6)    C(5)    C(9)    177.8(2) 1_555 1_555 1_555 1_555 yes
   C(2)    C(9)    C(5)    C(6)    -3.5(3)  1_555 1_555 1_555 1_555 yes
   C(2)    C(10)   C(3)    C(6)    -5.3(3)  1_555 1_555 1_555 1_555 yes
   C(2)    C(10)   C(4)    C(7)    119.3(2) 1_555 1_555 1_555 1_555 yes
   C(2)    C(10)   C(4)    C(14)   -0.1(3)  1_555 1_555 1_555 1_555 yes
   C(2)    C(10)   C(4)    C(15)   -120.2(2) 1_555 1_555 1_555 1_555 yes
   C(3)    C(6)    C(5)    C(9)    0.3(3)   1_555 1_555 1_555 1_555 yes
   C(3)    C(10)   C(2)    C(9)    2.1(3)   1_555 1_555 1_555 1_555 yes
   C(3)    C(10)   C(4)    C(7)    -58.1(2) 1_555 1_555 1_555 1_555 yes
   C(3)    C(10)   C(4)    C(14)   -177.4(2) 1_555 1_555 1_555 1_555 yes
   C(3)    C(10)   C(4)    C(15)   62.5(2)  1_555 1_555 1_555 1_555 yes
   C(4)    C(10)   C(2)    C(9)    -175.4(2) 1_555 1_555 1_555 1_555 yes
   C(4)    C(10)   C(3)    C(6)    172.2(2) 1_555 1_555 1_555 1_555 yes
   C(5)    C(6)    C(3)    C(10)   4.3(3)   1_555 1_555 1_555 1_555 yes
   C(5)    C(9)    C(2)    C(10)   2.3(3)   1_555 1_555 1_555 1_555 yes
   C(6)    C(1)    N(1)    C(12)   173.1(2) 1_555 1_555 1_555 1_555 yes
   C(6)    C(5)    C(9)    C(13)   177.8(2) 1_555 1_555 1_555 1_555 yes
   C(8)    C(12)   C(11)   C(16)   -23.0(2) 1_555 1_555 1_555 1_555 yes
   C(8)    C(16)   C(11)   C(12)   23.2(2)  1_555 1_555 1_555 1_555 yes
   C(10)   C(2)    C(9)    C(13)   -179.0(2) 1_555 1_555 1_555 1_555 yes
   C(11)   C(12)   C(8)    C(16)   23.1(2)  1_555 1_555 1_555 1_555 yes
   C(11)   C(16)   C(8)    C(12)   -23.0(2) 1_555 1_555 1_555 1_555 yes
#------------------------------------------------------------------------------
loop_
_geom_contact_atom_site_label_1
_geom_contact_atom_site_label_2
_geom_contact_distance
_geom_contact_site_symmetry_1
_geom_contact_site_symmetry_2
_geom_contact_publ_flag
 Cl(1)     H(18)     2.87(2)    1_555 2_566 ?
 Cl(1)     H(2)      3.07(2)    1_555 4_555 ?
 Cl(1)     H(13)     3.09(2)    1_555 2_566 ?
 Cl(1)     H(15)     3.34(2)    1_555 2_566 ?
 Cl(1)     H(22)     3.34(2)    1_555 4_555 ?
 C(2)      H(17)     2.83(2)    1_555 3_556 ?
 C(2)      H(6)      3.20(2)    1_555 6_546 ?
 C(2)      H(10)     3.39(2)    1_555 6_546 ?
 C(3)      H(17)     3.18(2)    1_555 3_556 ?
 C(5)      H(17)     3.19(2)    1_555 3_556 ?
 C(5)      H(7)      3.39(2)    1_555 1_545 ?
 C(5)      H(9)      3.51(2)    1_555 1_545 ?
 C(5)      H(19)     3.54(2)    1_555 3_556 ?
 C(6)      H(17)     3.27(2)    1_555 3_556 ?
 C(7)      H(17)     3.49(2)    1_555 3_556 ?
 C(7)      H(13)     3.57(2)    1_555 2_566 ?
 C(8)      H(7)      3.41(2)    1_555 3_556 ?
 C(9)      H(17)     3.02(2)    1_555 3_556 ?
 C(9)      H(19)     3.36(2)    1_555 3_556 ?
 C(9)      H(7)      3.53(2)    1_555 1_545 ?
 C(9)      H(9)      3.54(2)    1_555 1_545 ?
 C(10)     H(17)     2.92(2)    1_555 3_556 ?
 C(10)     H(6)      3.41(2)    1_555 6_546 ?
 C(11)     H(9)      3.40(2)    1_555 2_546 ?
 C(13)     H(20)     3.24(2)    1_555 7_546 ?
 C(13)     H(12)     3.36(2)    1_555 4_554 ?
 C(13)     H(15)     3.37(2)    1_555 3_546 ?
 C(13)     H(19)     3.39(2)    1_555 3_556 ?
 C(13)     H(7)      3.39(2)    1_555 1_545 ?
 C(13)     H(10)     3.47(2)    1_555 4_554 ?
 C(13)     H(21)     3.49(2)    1_555 7_546 ?
 C(14)     H(16)     3.35(2)    1_555 5_555 ?
 C(14)     H(11)     3.35(2)    1_555 6_556 ?
 C(14)     H(6)      3.48(2)    1_555 6_546 ?
 C(15)     H(20)     3.19(2)    1_555 4_555 ?
 C(15)     H(22)     3.32(2)    1_555 4_555 ?
 C(15)     H(6)      3.41(2)    1_555 6_546 ?
 C(15)     H(15)     3.43(2)    1_555 2_566 ?
 C(15)     H(21)     3.45(2)    1_555 6_556 ?
 C(16)     H(22)     3.40(2)    1_555 3_546 ?
 C(16)     H(4)      3.50(2)    1_555 5_445 ?
 C(16)     H(5)      3.52(2)    1_555 5_445 ?
 H(1)      H(10)     2.76(3)    1_555 6_546 ?
 H(1)      H(6)      3.05(3)    1_555 6_546 ?
 H(1)      H(17)     3.20(3)    1_555 3_556 ?
 H(2)      H(7)      3.09(3)    1_555 1_545 ?
 H(2)      H(8)      3.53(3)    1_555 1_545 ?
 H(2)      H(18)     3.54(3)    1_555 3_546 ?
 H(2)      H(9)      3.57(3)    1_555 1_545 ?
 H(2)      H(19)     3.57(3)    1_555 3_556 ?
 H(4)      H(6)      2.72(3)    1_555 6_546 ?
 H(4)      H(9)      2.77(3)    1_555 6_546 ?
 H(4)      H(10)     3.12(3)    1_555 6_546 ?
 H(4)      H(16)     3.14(3)    1_555 5_555 ?
 H(4)      H(14)     3.27(3)    1_555 5_555 ?
 H(4)      H(15)     3.38(3)    1_555 5_555 ?
 H(5)      H(16)     2.80(3)    1_555 5_555 ?
 H(5)      H(11)     3.21(3)    1_555 6_556 ?
 H(5)      H(21)     3.35(3)    1_555 1_565 ?
 H(6)      H(11)     2.64(3)    1_555 6_556 ?
 H(6)      H(14)     3.36(3)    1_555 5_555 ?
 H(6)      H(16)     3.50(3)    1_555 5_555 ?
 H(7)      H(17)     2.88(3)    1_555 3_556 ?
 H(7)      H(21)     3.05(3)    1_555 1_565 ?
 H(7)      H(22)     3.28(3)    1_555 1_565 ?
 H(7)      H(18)     3.31(3)    1_555 3_556 ?
 H(8)      H(13)     3.02(3)    1_555 2_566 ?
 H(9)      H(14)     3.09(3)    1_555 2_566 ?
 H(9)      H(13)     3.19(3)    1_555 2_566 ?
 H(9)      H(21)     3.34(3)    1_555 1_565 ?
 H(9)      H(15)     3.41(3)    1_555 2_566 ?
 H(10)     H(15)     2.82(3)    1_555 2_566 ?
 H(10)     H(20)     3.02(3)    1_555 4_555 ?
 H(10)     H(21)     3.04(3)    1_555 6_556 ?
 H(10)     H(22)     3.05(3)    1_555 4_555 ?
 H(10)     H(20)     3.56(3)    1_555 6_556 ?
 H(11)     H(21)     2.91(3)    1_555 6_556 ?
 H(11)     H(20)     2.92(3)    1_555 4_555 ?
 H(11)     H(22)     3.45(3)    1_555 4_555 ?
 H(12)     H(22)     2.83(3)    1_555 4_555 ?
 H(12)     H(20)     2.98(3)    1_555 4_555 ?
 H(12)     H(15)     3.13(3)    1_555 2_566 ?
 H(15)     H(22)     2.58(3)    1_555 3_546 ?
 H(15)     H(21)     3.44(3)    1_555 3_546 ?
 H(16)     H(20)     3.44(3)    1_555 3_556 ?
 H(18)     H(22)     3.51(3)    1_555 3_546 ?
 H(19)     H(20)     3.11(3)    1_555 3_556 ?
 H(19)     H(22)     3.22(3)    1_555 3_556 ?
 H(20)     H(21)     2.75(3)    1_555 7_546 ?
 H(20)     H(20)     2.83(4)    1_555 7_546 ?
 H(21)     H(21)     3.36(4)    1_555 7_546 ?
#------------------------------------------------------------------------------

_publ_contact_author_name           ' Terunori FUJITA'

_publ_contact_author_address
;
    R & D Center, Mitsui Chemicals, Inc., 580-32, Nagaura, 
Sodegaura, Chiba, 299-0265, Japan
;
_publ_contact_author_email            ' Terunori.Fujita@mitsui-chem.co.jp '
_publ_contact_author_fax              ' +81-438-64-2375 '
_publ_contact_author_phone            ' +81-438-64-2317 '
_publ_contact_letter
;
    
;

_publ_section_references
;
Molecular Structure Corporation, Rigaku Corporation. (1998). teXsan. 
Single Crystal Structure Analysis Software. Version 1.9.
MSC, 3200 Research Forest Drive, The Woodlands, TX 77381, USA.
Rigaku, 3-9-12 Akishima, Tokyo, Japan.
North, A.C.T., Phillips, D. C. & Mathews, F. S. (1968).
Acta Cryst. A24, 351-359.
;
#===END

data_Complex5
#------------------------------------------------------------------------------
_audit_creation_date                  'Mon Mar 19 16:23:59 2002'
_audit_creation_method                'from TEXRAY.INF file'
_audit_update_record                   ?
#------------------------------------------------------------------------------
_computing_data_collection            'Rigaku/AFC Diffractometer Control'
_computing_cell_refinement            'Rigaku/AFC Diffractometer Control'
_computing_data_reduction             'teXsan'
_computing_structure_solution          ?
_computing_structure_refinement       'teXsan'
_computing_publication_material       'teXsan'
_computing_molecular_graphics          ?
#------------------------------------------------------------------------------
_chemical_compound_source              ?
_chemical_name_common                  ?
_chemical_formula_weight               678.89
_chemical_formula_analytical           ?
_chemical_formula_sum                  'C34 H48 Cl2 N2 O2 Zr '
_chemical_formula_moiety               'C34 H48 Cl2 N2 O2 Zr '
_chemical_formula_structural           ?
_chemical_melting_point                ?
#------------------------------------------------------------------------------
_cell_length_a                         23.367(2)
_cell_length_b                         23.367(2)
_cell_length_c                         14.368(2)
_cell_angle_alpha                      90
_cell_angle_beta                       90
_cell_angle_gamma                      90
_cell_volume                           7845(1)
_cell_formula_units_Z                  8
_cell_measurement_temperature          233.2
_cell_measurement_reflns_used          25
_cell_measurement_theta_min            15.0
_cell_measurement_theta_max            17.3
#------------------------------------------------------------------------------
_symmetry_cell_setting                 tetragonal
_symmetry_space_group_name_H-M        'I -4 2 d     '
_symmetry_Int_Tables_number            122
_symmetry_space_group_name_Hall        ?
loop_
_symmetry_equiv_pos_as_xyz
x,y,z
-x,1/2+y,1/4-z
-x,-y,z
x,1/2-y,1/4-z
-y,x,-z
y,1/2+x,1/4+z
y,-x,-z
-y,1/2-x,1/4+z
1/2+x,1/2+y,1/2+z
1/2-x,y,3/4-z
1/2-x,1/2-y,1/2+z
1/2+x,-y,3/4-z
1/2-y,1/2+x,1/2-z
1/2+y,x,3/4+z
1/2+y,1/2-x,1/2-z
1/2-y,-x,3/4+z
#------------------------------------------------------------------------------
_exptl_crystal_description            'prismatic'
_exptl_crystal_colour                 'pale yellow'
_exptl_crystal_size_max                0.200
_exptl_crystal_size_mid                0.150
_exptl_crystal_size_min                0.150
_exptl_crystal_density_diffrn          1.150
_exptl_crystal_density_method         'not measured'
_exptl_crystal_F_000                   2848.00
_exptl_absorpt_coefficient_mu          0.443
_exptl_absorpt_correction_type         psi-scan
_exptl_absorpt_process_details        '(North, Phillips & Mathews, 1968)'
_exptl_absorpt_correction_T_min        0.893
_exptl_absorpt_correction_T_max        0.999
_exptl_special_details
;
 ?
;
#------------------------------------------------------------------------------
_diffrn_special_details
;
 ?
;
_diffrn_ambient_temperature            233.2
_diffrn_radiation_wavelength           0.7107
_diffrn_radiation_type                'Mo K\a'
_diffrn_radiation_source              'Rigaku rotating anode'
_diffrn_radiation_monochromator        graphite
_diffrn_radiation_detector            'scintillation counter'
_diffrn_measurement_device_type       'Rigaku AFC7R'
_diffrn_measurement_method             \w
_diffrn_measured_fraction_theta_full  27.50

_diffrn_standards_number              3
_diffrn_standards_interval_count      150
_diffrn_standards_decay_%             -2.34
loop_
_diffrn_standard_refln_index_h
_diffrn_standard_refln_index_k
_diffrn_standard_refln_index_l
     -3       3      2
     -3       4     -1
     -4      -3      1
_diffrn_reflns_number                  3652
_reflns_number_total                   2455
_reflns_number_gt                      2009
_reflns_observed_expression             >2.0sigma(I)
_diffrn_reflns_av_R_equivalents        0.023
_diffrn_reflns_av_sigmaI/netI          0.029
_diffrn_reflns_limit_h_min             -30
_diffrn_reflns_limit_h_max             16
_diffrn_reflns_limit_k_min             0
_diffrn_reflns_limit_k_max             21
_diffrn_reflns_limit_l_min             -10
_diffrn_reflns_limit_l_max             18
_diffrn_reflns_theta_min               2.76
_diffrn_reflns_theta_max               27.50
_diffrn_reflns_theta_full              27.50
_diffrn_reflns_reduction_process      'Lp corrections applied'
_diffrn_orient_matrix_UB_11           -0.02883
_diffrn_orient_matrix_UB_12            0.01842
_diffrn_orient_matrix_UB_13            0.04182
_diffrn_orient_matrix_UB_21           -0.00995
_diffrn_orient_matrix_UB_22            0.02776
_diffrn_orient_matrix_UB_23           -0.05045
_diffrn_orient_matrix_UB_31           -0.02999
_diffrn_orient_matrix_UB_32           -0.02689
_diffrn_orient_matrix_UB_33           -0.02347
#------------------------------------------------------------------------------
loop_
_atom_type_symbol
_atom_type_description
_atom_type_scat_dispersion_real
_atom_type_scat_imag
_atom_type_scat_source
  'C'  'C'   0.003 0.002 
;International Tables for Crystallography
(1992, Vol. C, Tables 4.2.6.8 and 6.1.1.1)
;
  'H'  'H'   0.000 0.000 
;International Tables for Crystallography
(1992, Vol. C, Table 6.1.1.2)
;
  'N'  'N'   0.006 0.003 
;International Tables for Crystallography
(1992, Vol. C, Tables 4.2.6.8 and 6.1.1.1)
;
  'O'  'O'   0.011 0.006 
;International Tables for Crystallography
(1992, Vol. C, Tables 4.2.6.8 and 6.1.1.1)
;
  'Cl'  'Cl'   0.148 0.159 
;International Tables for Crystallography
(1992, Vol. C, Tables 4.2.6.8 and 6.1.1.1)
;
  'Zr'  'Zr'   -2.967 0.560 
;International Tables for Crystallography
(1992, Vol. C, Tables 4.2.6.8 and 6.1.1.1)
;
#------------------------------------------------------------------------------
loop_
_atom_site_label
_atom_site_type_symbol
_atom_site_fract_x
_atom_site_fract_y
_atom_site_fract_z
_atom_site_U_iso_or_equiv
_atom_site_adp_type
_atom_site_occupancy
_atom_site_calc_flags
_atom_site_refinement_flags
_atom_site_disorder_assembly
_atom_site_disorder_group
 Zr(1)  Zr 0.7500      -0.03581(4) 0.3750      0.0376(3)   Uiso 1.00 d S . .
 Cl(1)  Cl 0.6735(2)   -0.1025(1)  0.3415(3)   0.0867(10)  Uani 1.00 d . . .
 O(1)   O  0.7769(2)   -0.0256(2)  0.2442(4)   0.042(1)    Uani 1.00 d . . .
 N(1)   N  0.6917(3)   0.0379(3)   0.3252(5)   0.040(1)    Uani 1.00 d . . .
 C(1)   C  0.7717(4)   0.0039(4)   0.1670(6)   0.046(2)    Uani 1.00 d . . .
 C(2)   C  0.8048(5)   -0.0084(5)  0.0867(7)   0.060(2)    Uani 1.00 d . . .
 C(3)   C  0.7942(6)   0.0261(7)   0.0093(7)   0.078(3)    Uani 1.00 d . . .
 C(4)   C  0.7593(7)   0.0727(6)   0.0080(7)   0.083(4)    Uani 1.00 d . . .
 C(5)   C  0.7263(6)   0.0828(6)   0.0850(7)   0.073(3)    Uani 1.00 d . . .
 C(6)   C  0.7330(4)   0.0502(4)   0.1668(6)   0.047(2)    Uani 1.00 d . . .
 C(7)   C  0.6954(4)   0.0629(4)   0.2440(6)   0.048(2)    Uani 1.00 d . . .
 C(8)   C  0.6462(4)   0.0594(4)   0.3878(5)   0.049(2)    Uani 1.00 d . . .
 C(9)   C  0.5860(5)   0.0538(5)   0.3462(8)   0.070(3)    Uani 1.00 d . . .
 C(10)  C  0.5427(6)   0.0747(7)   0.419(1)    0.088(4)    Uani 1.00 d . . .
 C(11)  C  0.5534(7)   0.1349(7)   0.448(1)    0.097(4)    Uani 1.00 d . . .
 C(12)  C  0.6132(8)   0.1414(6)   0.4871(9)   0.083(3)    Uani 1.00 d . . .
 C(13)  C  0.6588(5)   0.1212(5)   0.4172(7)   0.066(3)    Uani 1.00 d . . .
 C(14)  C  0.8451(6)   -0.0597(6)  0.0835(10)  0.080(3)    Uani 1.00 d . . .
 C(15)  C  0.8932(6)   -0.0504(6)  0.1542(10)  0.085(4)    Uani 1.00 d . . .
 C(16)  C  0.873(1)    -0.0665(9)  -0.011(1)   0.123(7)    Uani 1.00 d . . .
 C(17)  C  0.8131(7)   -0.1147(6)  0.106(1)    0.093(4)    Uani 1.00 d . . .
 H(1)   H  0.8129      0.0163      -0.0472     0.0935      Uiso 1.00 calc . . .
 H(2)   H  0.7578      0.0974      -0.0445     0.0999      Uiso 1.00 calc . . .
 H(3)   H  0.6984      0.1123      0.0832      0.0871      Uiso 1.00 calc . . .
 H(4)   H  0.6697      0.0938      0.2344      0.0576      Uiso 1.00 calc . . .
 H(5)   H  0.6471      0.0366      0.4425      0.0592      Uiso 1.00 calc . . .
 H(6)   H  0.5831      0.0766      0.2916      0.0840      Uiso 1.00 calc . . .
 H(7)   H  0.5785      0.0149      0.3310      0.0840      Uiso 1.00 calc . . .
 H(8)   H  0.5052      0.0721      0.3937      0.1059      Uiso 1.00 calc . . .
 H(9)   H  0.5452      0.0508      0.4725      0.1059      Uiso 1.00 calc . . .
 H(10)  H  0.5492      0.1593      0.3955      0.1161      Uiso 1.00 calc . . .
 H(11)  H  0.5263      0.1454      0.4944      0.1161      Uiso 1.00 calc . . .
 H(12)  H  0.6197      0.1805      0.5014      0.1000      Uiso 1.00 calc . . .
 H(13)  H  0.6163      0.1192      0.5423      0.1000      Uiso 1.00 calc . . .
 H(14)  H  0.6581      0.1453      0.3640      0.0792      Uiso 1.00 calc . . .
 H(15)  H  0.6955      0.1230      0.4455      0.0792      Uiso 1.00 calc . . .
 H(16)  H  0.8773      -0.0474     0.2149      0.1014      Uiso 1.00 calc . . .
 H(17)  H  0.9132      -0.0162     0.1395      0.1014      Uiso 1.00 calc . . .
 H(18)  H  0.9189      -0.0818     0.1521      0.1014      Uiso 1.00 calc . . .
 H(19)  H  0.8928      -0.0320     -0.0268     0.1473      Uiso 1.00 calc . . .
 H(20)  H  0.9001      -0.0971     -0.0087     0.1473      Uiso 1.00 calc . . .
 H(21)  H  0.8451      -0.0745     -0.0566     0.1473      Uiso 1.00 calc . . .
 H(22)  H  0.8389      -0.1461     0.1041      0.1120      Uiso 1.00 calc . . .
 H(23)  H  0.7837      -0.1205     0.0612      0.1120      Uiso 1.00 calc . . .
 H(24)  H  0.7967      -0.1119     0.1662      0.1120      Uiso 1.00 calc . . .

loop_
_atom_site_aniso_label
_atom_site_aniso_U_11
_atom_site_aniso_U_22
_atom_site_aniso_U_33
_atom_site_aniso_U_12
_atom_site_aniso_U_13
_atom_site_aniso_U_23
 Cl(1)  0.101(2)    0.076(2)    0.083(2)    -0.048(2)   -0.037(2)   0.010(1)   
 O(1)   0.043(3)    0.041(3)    0.042(2)    0.009(2)    -0.011(2)   -0.008(2)  
 N(1)   0.041(3)    0.035(3)    0.043(3)    0.004(2)    0.004(2)    0.012(2)   
 C(1)   0.054(4)    0.043(3)    0.040(3)    -0.002(3)   -0.010(3)   -0.008(3)  
 C(2)   0.054(5)    0.077(6)    0.048(4)    0.006(4)    0.000(3)    -0.011(4)  
 C(3)   0.086(8)    0.111(9)    0.036(4)    0.028(7)    0.010(5)    -0.004(5)  
 C(4)   0.10(1)     0.103(9)    0.044(5)    0.032(7)    0.026(6)    0.013(6)   
 C(5)   0.082(7)    0.093(8)    0.042(4)    0.021(6)    0.016(5)    0.022(5)   
 C(6)   0.047(4)    0.054(4)    0.039(3)    0.005(3)    -0.003(3)   -0.009(3)  
 C(7)   0.055(4)    0.054(4)    0.034(3)    0.010(4)    0.000(3)    0.004(3)   
 C(8)   0.058(4)    0.059(4)    0.030(4)    0.011(3)    0.016(3)    0.013(3)   
 C(9)   0.060(4)    0.082(7)    0.068(6)    0.002(5)    -0.001(4)   0.016(5)   
 C(10)  0.068(7)    0.112(8)    0.085(8)    0.028(7)    0.020(6)    0.025(7)   
 C(11)  0.101(7)    0.107(8)    0.083(9)    0.066(7)    0.030(7)    0.016(7)   
 C(12)  0.114(8)    0.077(7)    0.060(6)    0.040(7)    0.018(6)    0.004(5)   
 C(13)  0.089(7)    0.060(4)    0.049(5)    0.022(5)    -0.014(4)   -0.005(4)  
 C(14)  0.099(8)    0.075(5)    0.066(5)    0.035(5)    -0.004(4)   -0.037(5)  
 C(15)  0.073(6)    0.098(9)    0.083(8)    0.025(7)    0.010(5)    -0.029(7)  
 C(16)  0.16(2)     0.12(1)     0.081(9)    0.00(1)     0.06(1)     -0.047(10) 
 C(17)  0.098(9)    0.081(7)    0.10(1)     0.017(6)    -0.014(8)   -0.041(8)  
#------------------------------------------------------------------------------
_refine_special_details
;
Refinement based on F against all reflections. The weighted R-factor (wR) and
goodness of fit (S) are based on F, conventional R-factors (R) are calculated
on F, with F set to zero for negative F. The threshold expression of
F^2^ > 2sigma(F^2^) is used only for calculating R-factors(gt) etc. thus the
refinement was done using all reflections.  
;

_refine_ls_structure_factor_coef       F
_refine_ls_matrix_type                 full
_refine_ls_weighting_scheme            calc
_refine_ls_weighting_details
   'w = 1/[\s^2^(Fo) + 0.01000|Fo|^2^]'
_refine_ls_hydrogen_treatment          noref
_refine_ls_extinction_method           none
_refine_ls_extinction_coef             ?
_refine_ls_abs_structure_details       ?
_refine_ls_abs_structure_Flack         1.0(2)
_refine_ls_number_reflns               2009
_refine_ls_number_parameters           184
_refine_ls_number_restraints           0
_refine_ls_number_constraints          0
_refine_ls_R_factor_all                0.0726
_refine_ls_R_factor_gt                 0.0726
_refine_ls_wR_factor_all               ?
_refine_ls_wR_factor_ref               0.1214
_refine_ls_wR_factor_gt                0.1214
_refine_ls_goodness_of_fit_all         ?
_refine_ls_goodness_of_fit_ref         1.167
_refine_ls_shift/su_max                0.0013
_refine_ls_shift/su_mean               0.0000
_refine_diff_density_min               -0.81
_refine_diff_density_max               2.11
#------------------------------------------------------------------------------
_geom_special_details
;
 ?
;
loop_
_geom_bond_atom_site_label_1
_geom_bond_atom_site_label_2
_geom_bond_distance
_geom_bond_site_symmetry_1
_geom_bond_site_symmetry_2
_geom_bond_publ_flag
 Zr(1)     Cl(1)     2.419(3)   1_555 1_555 yes
 Zr(1)     Cl(1)     2.419(3)   1_555 10_655 yes
 Zr(1)     O(1)      1.995(7)   1_555 1_555 yes
 Zr(1)     O(1)      1.995(7)   1_555 10_655 yes
 Zr(1)     N(1)      2.309(6)   1_555 1_555 yes
 Zr(1)     N(1)      2.309(6)   1_555 10_655 yes
 O(1)      C(1)      1.31(1)    1_555 1_555 yes
 N(1)      C(7)      1.31(1)    1_555 1_555 yes
 N(1)      C(8)      1.48(1)    1_555 1_555 yes
 C(1)      C(2)      1.42(2)    1_555 1_555 yes
 C(1)      C(6)      1.41(1)    1_555 1_555 yes
 C(2)      C(3)      1.40(2)    1_555 1_555 yes
 C(2)      C(14)     1.52(2)    1_555 1_555 yes
 C(3)      C(4)      1.36(2)    1_555 1_555 yes
 C(4)      C(5)      1.37(2)    1_555 1_555 yes
 C(5)      C(6)      1.41(1)    1_555 1_555 yes
 C(6)      C(7)      1.45(1)    1_555 1_555 yes
 C(8)      C(9)      1.53(2)    1_555 1_555 yes
 C(8)      C(13)     1.53(2)    1_555 1_555 yes
 C(9)      C(10)     1.54(2)    1_555 1_555 yes
 C(10)     C(11)     1.49(3)    1_555 1_555 yes
 C(11)     C(12)     1.51(3)    1_555 1_555 yes
 C(12)     C(13)     1.54(2)    1_555 1_555 yes
 C(14)     C(15)     1.53(2)    1_555 1_555 yes
 C(14)     C(16)     1.52(2)    1_555 1_555 yes
 C(14)     C(17)     1.52(2)    1_555 1_555 yes
#------------------------------------------------------------------------------
loop_
_geom_angle_atom_site_label_1
_geom_angle_atom_site_label_2
_geom_angle_atom_site_label_3
_geom_angle
_geom_angle_site_symmetry_1
_geom_angle_site_symmetry_2
_geom_angle_site_symmetry_3
_geom_angle_publ_flag
   Cl(1)     Zr(1)     Cl(1)     99.8(2)    1_555 1_555 10_655 yes
   Cl(1)     Zr(1)     O(1)      97.0(2)    1_555 1_555 1_555 yes
   Cl(1)     Zr(1)     O(1)      91.8(2)    1_555 1_555 10_655 yes
   Cl(1)     Zr(1)     N(1)      89.0(2)    1_555 1_555 1_555 yes
   Cl(1)     Zr(1)     N(1)      167.9(2)   1_555 1_555 10_655 yes
   Cl(1)     Zr(1)     O(1)      91.8(2)    10_655 1_555 1_555 yes
   Cl(1)     Zr(1)     O(1)      97.0(2)    10_655 1_555 10_655 yes
   Cl(1)     Zr(1)     N(1)      167.9(2)   10_655 1_555 1_555 yes
   Cl(1)     Zr(1)     N(1)      89.0(2)    10_655 1_555 10_655 yes
   O(1)      Zr(1)     O(1)      166.3(3)   1_555 1_555 10_655 yes
   O(1)      Zr(1)     N(1)      78.8(2)    1_555 1_555 1_555 yes
   O(1)      Zr(1)     N(1)      91.0(3)    1_555 1_555 10_655 yes
   O(1)      Zr(1)     N(1)      91.0(3)    10_655 1_555 1_555 yes
   O(1)      Zr(1)     N(1)      78.8(2)    10_655 1_555 10_655 yes
   N(1)      Zr(1)     N(1)      83.6(4)    1_555 1_555 10_655 yes
   Zr(1)     O(1)      C(1)      146.1(6)   1_555 1_555 1_555 yes
   Zr(1)     N(1)      C(7)      124.7(6)   1_555 1_555 1_555 yes
   Zr(1)     N(1)      C(8)      119.3(5)   1_555 1_555 1_555 yes
   C(7)      N(1)      C(8)      116.0(7)   1_555 1_555 1_555 yes
   O(1)      C(1)      C(2)      122.0(9)   1_555 1_555 1_555 yes
   O(1)      C(1)      C(6)      117.7(8)   1_555 1_555 1_555 yes
   C(2)      C(1)      C(6)      120.3(9)   1_555 1_555 1_555 yes
   C(1)      C(2)      C(3)      115(1)     1_555 1_555 1_555 yes
   C(1)      C(2)      C(14)     121(1)     1_555 1_555 1_555 yes
   C(3)      C(2)      C(14)     122(1)     1_555 1_555 1_555 yes
   C(2)      C(3)      C(4)      125.4(10)  1_555 1_555 1_555 yes
   C(2)      C(3)      H(1)      117(1)     1_555 1_555 1_555 no
   C(4)      C(3)      H(1)      117(1)     1_555 1_555 1_555 no
   C(3)      C(4)      C(5)      117(1)     1_555 1_555 1_555 yes
   C(3)      C(4)      H(2)      121(1)     1_555 1_555 1_555 no
   C(5)      C(4)      H(2)      121(1)     1_555 1_555 1_555 no
   C(4)      C(5)      C(6)      121(1)     1_555 1_555 1_555 yes
   C(4)      C(5)      H(3)      119(1)     1_555 1_555 1_555 no
   C(6)      C(5)      H(3)      119(1)     1_555 1_555 1_555 no
   C(1)      C(6)      C(5)      119.2(9)   1_555 1_555 1_555 yes
   C(1)      C(6)      C(7)      123.1(9)   1_555 1_555 1_555 yes
   C(5)      C(6)      C(7)      117.5(9)   1_555 1_555 1_555 yes
   N(1)      C(7)      C(6)      129.3(9)   1_555 1_555 1_555 yes
   N(1)      C(7)      H(4)      115.3(9)   1_555 1_555 1_555 no
   C(6)      C(7)      H(4)      115.3(9)   1_555 1_555 1_555 no
   N(1)      C(8)      C(9)      113.1(8)   1_555 1_555 1_555 yes
   N(1)      C(8)      C(13)     110.4(8)   1_555 1_555 1_555 yes
   N(1)      C(8)      H(5)      107.2(8)   1_555 1_555 1_555 no
   C(9)      C(8)      C(13)     111.3(9)   1_555 1_555 1_555 yes
   C(9)      C(8)      H(5)      107.2(9)   1_555 1_555 1_555 no
   C(13)     C(8)      H(5)      107.2(9)   1_555 1_555 1_555 no
   C(8)      C(9)      C(10)     108(1)     1_555 1_555 1_555 yes
   C(8)      C(9)      H(6)      109(1)     1_555 1_555 1_555 no
   C(8)      C(9)      H(7)      109(1)     1_555 1_555 1_555 no
   C(10)     C(9)      H(6)      109(1)     1_555 1_555 1_555 no
   C(10)     C(9)      H(7)      109(1)     1_555 1_555 1_555 no
   H(6)      C(9)      H(7)      109(1)     1_555 1_555 1_555 no
   C(9)      C(10)     C(11)     112(1)     1_555 1_555 1_555 yes
   C(9)      C(10)     H(8)      108(1)     1_555 1_555 1_555 no
   C(9)      C(10)     H(9)      108(1)     1_555 1_555 1_555 no
   C(11)     C(10)     H(8)      108(1)     1_555 1_555 1_555 no
   C(11)     C(10)     H(9)      108(1)     1_555 1_555 1_555 no
   H(8)      C(10)     H(9)      109(1)     1_555 1_555 1_555 no
   C(10)     C(11)     C(12)     110(1)     1_555 1_555 1_555 yes
   C(10)     C(11)     H(10)     109(1)     1_555 1_555 1_555 no
   C(10)     C(11)     H(11)     109(1)     1_555 1_555 1_555 no
   C(12)     C(11)     H(10)     109(1)     1_555 1_555 1_555 no
   C(12)     C(11)     H(11)     109(1)     1_555 1_555 1_555 no
   H(10)     C(11)     H(11)     109(1)     1_555 1_555 1_555 no
   C(11)     C(12)     C(13)     111(1)     1_555 1_555 1_555 yes
   C(11)     C(12)     H(12)     108(1)     1_555 1_555 1_555 no
   C(11)     C(12)     H(13)     108(1)     1_555 1_555 1_555 no
   C(13)     C(12)     H(12)     108(1)     1_555 1_555 1_555 no
   C(13)     C(12)     H(13)     108(1)     1_555 1_555 1_555 no
   H(12)     C(12)     H(13)     109(1)     1_555 1_555 1_555 no
   C(8)      C(13)     C(12)     109(1)     1_555 1_555 1_555 yes
   C(8)      C(13)     H(14)     109.4(9)   1_555 1_555 1_555 no
   C(8)      C(13)     H(15)     109(1)     1_555 1_555 1_555 no
   C(12)     C(13)     H(14)     109(1)     1_555 1_555 1_555 no
   C(12)     C(13)     H(15)     109(1)     1_555 1_555 1_555 no
   H(14)     C(13)     H(15)     109(1)     1_555 1_555 1_555 no
   C(2)      C(14)     C(15)     108.7(10)  1_555 1_555 1_555 yes
   C(2)      C(14)     C(16)     112(1)     1_555 1_555 1_555 yes
   C(2)      C(14)     C(17)     110(1)     1_555 1_555 1_555 yes
   C(15)     C(14)     C(16)     106(1)     1_555 1_555 1_555 yes
   C(15)     C(14)     C(17)     109(1)     1_555 1_555 1_555 yes
   C(16)     C(14)     C(17)     108(1)     1_555 1_555 1_555 yes
   C(14)     C(15)     H(16)     109(1)     1_555 1_555 1_555 no
   C(14)     C(15)     H(17)     109(1)     1_555 1_555 1_555 no
   C(14)     C(15)     H(18)     109(1)     1_555 1_555 1_555 no
   H(16)     C(15)     H(17)     109(1)     1_555 1_555 1_555 no
   H(16)     C(15)     H(18)     109(1)     1_555 1_555 1_555 no
   H(17)     C(15)     H(18)     109(1)     1_555 1_555 1_555 no
   C(14)     C(16)     H(19)     109(1)     1_555 1_555 1_555 no
   C(14)     C(16)     H(20)     109(1)     1_555 1_555 1_555 no
   C(14)     C(16)     H(21)     109(1)     1_555 1_555 1_555 no
   H(19)     C(16)     H(20)     109(2)     1_555 1_555 1_555 no
   H(19)     C(16)     H(21)     109(2)     1_555 1_555 1_555 no
   H(20)     C(16)     H(21)     109(1)     1_555 1_555 1_555 no
   C(14)     C(17)     H(22)     109(1)     1_555 1_555 1_555 no
   C(14)     C(17)     H(23)     109(1)     1_555 1_555 1_555 no
   C(14)     C(17)     H(24)     109(1)     1_555 1_555 1_555 no
   H(22)     C(17)     H(23)     109(1)     1_555 1_555 1_555 no
   H(22)     C(17)     H(24)     109(2)     1_555 1_555 1_555 no
   H(23)     C(17)     H(24)     109(1)     1_555 1_555 1_555 no
#------------------------------------------------------------------------------
loop_
_geom_torsion_atom_site_label_1
_geom_torsion_atom_site_label_2
_geom_torsion_atom_site_label_3
_geom_torsion_atom_site_label_4
_geom_torsion
_geom_torsion_site_symmetry_1
_geom_torsion_site_symmetry_2
_geom_torsion_site_symmetry_3
_geom_torsion_site_symmetry_4
_geom_torsion_publ_flag
   Zr(1)   O(1)    C(1)    C(2)    180.0(8) 1_555 1_555 1_555 1_555 yes
   Zr(1)   O(1)    C(1)    C(6)    1(1)     1_555 1_555 1_555 1_555 yes
   Zr(1)   O(1)    C(1)    C(2)    180.0(8) 1_555 10_655 10_655 10_655 yes
   Zr(1)   O(1)    C(1)    C(6)    1(1)     1_555 10_655 10_655 10_655 yes
   Zr(1)   N(1)    C(7)    C(6)    2(1)     1_555 1_555 1_555 1_555 yes
   Zr(1)   N(1)    C(8)    C(9)    -120.4(7) 1_555 1_555 1_555 1_555 yes
   Zr(1)   N(1)    C(8)    C(13)   114.0(7) 1_555 1_555 1_555 1_555 yes
   Zr(1)   N(1)    C(7)    C(6)    2(1)     1_555 10_655 10_655 10_655 yes
   Zr(1)   N(1)    C(8)    C(9)    -120.4(7) 1_555 10_655 10_655 10_655 yes
   Zr(1)   N(1)    C(8)    C(13)   114.0(7) 1_555 10_655 10_655 10_655 yes
   Cl(1)   Zr(1)   O(1)    C(1)    90(1)    1_555 1_555 1_555 1_555 yes
   Cl(1)   Zr(1)   O(1)    C(1)    -169(1)  1_555 1_555 10_655 10_655 yes
   Cl(1)   Zr(1)   N(1)    C(7)    -101.9(8) 1_555 1_555 1_555 1_555 yes
   Cl(1)   Zr(1)   N(1)    C(8)    77.9(6)  1_555 1_555 1_555 1_555 yes
   Cl(1)   Zr(1)   N(1)    C(7)    35(1)    1_555 1_555 10_655 10_655 yes
   Cl(1)   Zr(1)   N(1)    C(8)    -145.2(9) 1_555 1_555 10_655 10_655 yes
   O(1)    Zr(1)   O(1)    C(1)    -39.5(10) 1_555 1_555 10_655 10_655 yes
   O(1)    Zr(1)   N(1)    C(7)    -4.6(7)  1_555 1_555 1_555 1_555 yes
   O(1)    Zr(1)   N(1)    C(8)    175.2(7) 1_555 1_555 1_555 1_555 yes
   O(1)    Zr(1)   N(1)    C(7)    166.3(8) 1_555 1_555 10_655 10_655 yes
   O(1)    Zr(1)   N(1)    C(8)    -13.9(7) 1_555 1_555 10_655 10_655 yes
   O(1)    C(1)    C(2)    C(3)    179(1)   1_555 1_555 1_555 1_555 yes
   O(1)    C(1)    C(2)    C(14)   4(1)     1_555 1_555 1_555 1_555 yes
   O(1)    C(1)    C(6)    C(5)    -179(1)  1_555 1_555 1_555 1_555 yes
   O(1)    C(1)    C(6)    C(7)    -5(1)    1_555 1_555 1_555 1_555 yes
   N(1)    Zr(1)   O(1)    C(1)    2(1)     1_555 1_555 1_555 1_555 yes
   N(1)    Zr(1)   O(1)    C(1)    -80(1)   1_555 1_555 10_655 10_655 yes
   N(1)    Zr(1)   N(1)    C(7)    87.7(8)  1_555 1_555 10_655 10_655 yes
   N(1)    Zr(1)   N(1)    C(8)    -92.5(7) 1_555 1_555 10_655 10_655 yes
   N(1)    C(7)    C(6)    C(1)    3(1)     1_555 1_555 1_555 1_555 yes
   N(1)    C(7)    C(6)    C(5)    177(1)   1_555 1_555 1_555 1_555 yes
   N(1)    C(8)    C(9)    C(10)   177.2(10) 1_555 1_555 1_555 1_555 yes
   N(1)    C(8)    C(13)   C(12)   -176.3(9) 1_555 1_555 1_555 1_555 yes
   C(1)    C(2)    C(3)    C(4)    6(2)     1_555 1_555 1_555 1_555 yes
   C(1)    C(2)    C(14)   C(15)   -65(1)   1_555 1_555 1_555 1_555 yes
   C(1)    C(2)    C(14)   C(16)   176(1)   1_555 1_555 1_555 1_555 yes
   C(1)    C(2)    C(14)   C(17)   55(1)    1_555 1_555 1_555 1_555 yes
   C(1)    C(6)    C(5)    C(4)    -4(2)    1_555 1_555 1_555 1_555 yes
   C(2)    C(1)    C(6)    C(5)    2(1)     1_555 1_555 1_555 1_555 yes
   C(2)    C(1)    C(6)    C(7)    175.9(9) 1_555 1_555 1_555 1_555 yes
   C(2)    C(3)    C(4)    C(5)    -8(2)    1_555 1_555 1_555 1_555 yes
   C(3)    C(2)    C(1)    C(6)    -2(1)    1_555 1_555 1_555 1_555 yes
   C(3)    C(2)    C(14)   C(15)   120(1)   1_555 1_555 1_555 1_555 yes
   C(3)    C(2)    C(14)   C(16)   2(2)     1_555 1_555 1_555 1_555 yes
   C(3)    C(2)    C(14)   C(17)   -118(1)  1_555 1_555 1_555 1_555 yes
   C(3)    C(4)    C(5)    C(6)    7(2)     1_555 1_555 1_555 1_555 yes
   C(4)    C(3)    C(2)    C(14)   -179(1)  1_555 1_555 1_555 1_555 yes
   C(4)    C(5)    C(6)    C(7)    -178(1)  1_555 1_555 1_555 1_555 yes
   C(6)    C(1)    C(2)    C(14)   -177.4(10) 1_555 1_555 1_555 1_555 yes
   C(6)    C(7)    N(1)    C(8)    -176.9(10) 1_555 1_555 1_555 1_555 yes
   C(7)    N(1)    C(8)    C(9)    59(1)    1_555 1_555 1_555 1_555 yes
   C(7)    N(1)    C(8)    C(13)   -66(1)   1_555 1_555 1_555 1_555 yes
   C(8)    C(9)    C(10)   C(11)   58(1)    1_555 1_555 1_555 1_555 yes
   C(8)    C(13)   C(12)   C(11)   -55(1)   1_555 1_555 1_555 1_555 yes
   C(9)    C(8)    C(13)   C(12)   57(1)    1_555 1_555 1_555 1_555 yes
   C(9)    C(10)   C(11)   C(12)   -58(1)   1_555 1_555 1_555 1_555 yes
   C(10)   C(9)    C(8)    C(13)   -57(1)   1_555 1_555 1_555 1_555 yes
   C(10)   C(11)   C(12)   C(13)   56(1)    1_555 1_555 1_555 1_555 yes
#------------------------------------------------------------------------------
loop_
_geom_contact_atom_site_label_1
_geom_contact_atom_site_label_2
_geom_contact_distance
_geom_contact_site_symmetry_1
_geom_contact_site_symmetry_2
_geom_contact_publ_flag
 Cl(1)     C(7)      3.594(10)  1_555 15_555 ?
#------------------------------------------------------------------------------

_publ_contact_author_name           ' Terunori FUJITA'

_publ_contact_author_address
;
    R & D Center, Mitsui Chemicals, Inc., 580-32, Nagaura, 
Sodegaura, Chiba, 299-0265, Japan
;
_publ_contact_author_email            ' Terunori.Fujita@mitsui-chem.co.jp '
_publ_contact_author_fax              ' +81-438-64-2375 '
_publ_contact_author_phone            ' +81-438-64-2317 '
_publ_contact_letter
;
    
;

_publ_section_references
;
Molecular Structure Corporation, Rigaku Corporation. (1998). teXsan. 
Single Crystal Structure Analysis Software. Version 1.9.
MSC, 3200 Research Forest Drive, The Woodlands, TX 77381, USA.
Rigaku, 3-9-12 Akishima, Tokyo, Japan.
North, A.C.T., Phillips, D. C. & Mathews, F. S. (1968).
Acta Cryst. A24, 351-359.
;
#===END

data_Complex8

# CHEMICAL DATA

_chemical_formula_sum                  'C124 H158 Cl4 N4 O5 Zr2 '
_chemical_formula_moiety               'C124 H158 Cl4 N4 O5 Zr2 '
_chemical_formula_weight               2108.89
_chemical_melting_point                ?

#==============================================================================

# CRYSTAL DATA
_symmetry_cell_setting                 triclinic
_symmetry_space_group_name_H-M        'p_-1'
_symmetry_space_group_name_Hall       '-p_1'
_symmetry_Int_Tables_number            2
loop_
_symmetry_equiv_pos_site_id
_symmetry_equiv_pos_as_xyz
1   +X,+Y,+Z
2   -X,-Y,-Z

#------------------------------------------------------------------------------

_cell_length_a                         17.131(4)
_cell_length_b                         22.418(5)
_cell_length_c                         15.140(3)
_cell_angle_alpha                      93.28(2)
_cell_angle_beta                       92.61(2)
_cell_angle_gamma                      72.34(2)
_cell_volume                           5528(2)
_cell_formula_units_Z                  2
_cell_measurement_reflns_used          23
_cell_measurement_theta_min            15.0
_cell_measurement_theta_max            17.3
_cell_measurement_temperature          223.1

#------------------------------------------------------------------------------

_exptl_crystal_description            'prismatic'
_exptl_crystal_colour                 'yellow'
_exptl_crystal_size_max                0.40
_exptl_crystal_size_mid                0.35
_exptl_crystal_size_min                0.20
_exptl_crystal_density_diffrn          1.267
_exptl_crystal_density_meas            ?
_exptl_crystal_density_method         'not measured'
_exptl_crystal_F_000                   2236.00
_exptl_absorpt_coefficient_mu          0.340
_exptl_absorpt_correction_type         psi-scans
_exptl_absorpt_process_details         '(North, Phillips & Mathews, 1968)'
_exptl_absorpt_correction_T_min        0.870
_exptl_absorpt_correction_T_max        0.934

#==============================================================================

# EXPERIMENTAL DATA

_diffrn_radiation_type                'Mo K\a'
_diffrn_radiation_wavelength           0.7107
_diffrn_measurement_device_type       'Rigaku AFC7R'
_diffrn_measurement_method             \w
_diffrn_reflns_number                  30328
_diffrn_reflns_av_R_equivalents        0.041
_diffrn_reflns_theta_max               27.49
_diffrn_measured_fraction_theta_max    0.9985
_diffrn_reflns_theta_full              27.49
_diffrn_measured_fraction_theta_full   0.9985
_diffrn_reflns_limit_h_min             -22
_diffrn_reflns_limit_h_max             22
_diffrn_reflns_limit_k_min             -29
_diffrn_reflns_limit_k_max             29
_diffrn_reflns_limit_l_min             -11
_diffrn_reflns_limit_l_max             19

_diffrn_standards_number               3
_diffrn_standards_interval_count       150
_diffrn_standards_decay_%              -0.57

#==============================================================================

# REFINEMENT DATA

_refine_special_details
;
    Refinement using reflections with F^2^ > 2.5 sigma(F^2^).
    The weighted     R-factor (wR) and goodness of fit (S) are based on F^2^.
    R-factor (gt) are based on F. The threshold expression of
    F^2^ > 2.0 sigma(F^2^) is used only for calculating R-factor (gt).
;
_reflns_number_total                   25350
_reflns_number_gt                      13882
_reflns_threshold_expression           F^2^>2.0\s(F^2^)
_refine_ls_structure_factor_coef       Fsqd
_refine_ls_R_factor_gt                 0.0590
_refine_ls_wR_factor_ref               0.1700
_refine_ls_hydrogen_treatment          refall
_refine_ls_number_reflns               13882
_refine_ls_number_parameters           1396
_refine_ls_goodness_of_fit_ref         1.003
_refine_ls_weighting_scheme            calc
_refine_ls_weighting_details
'w = 1/[0.0051Fo^2^ + 1.0000\s(Fo^2^)]/(4Fo^2^)'
_refine_ls_shift/su_max                0.0000
_refine_diff_density_max               0.90
_refine_diff_density_min               -0.63
_refine_ls_extinction_method           none
_refine_ls_extinction_coef             ?

loop_
_atom_type_symbol
_atom_type_description
_atom_type_scat_dispersion_real
_atom_type_scat_dispersion_imag
_atom_type_scat_source
  'C' 'C'  0.003 0.002 
;
International Tables for Crystallography
(1992, Vol. C, Tables 4.2.6.8 and 6.1.1.4)
;
  'H' 'H'  0.000 0.000 
;
International Tables for Crystallography
(1992, Vol. C, Table 6.1.1.4)
;
  'Cl' 'Cl'  0.148 0.159 
;
International Tables for Crystallography
(1992, Vol. C, Tables 4.2.6.8 and 6.1.1.4)
;
  'N' 'N'  0.006 0.003 
;
International Tables for Crystallography
(1992, Vol. C, Tables 4.2.6.8 and 6.1.1.4)
;
  'O' 'O'  0.011 0.006 
;
International Tables for Crystallography
(1992, Vol. C, Tables 4.2.6.8 and 6.1.1.4)
;
  'Zr' 'Zr'  -2.967 0.560 
;
International Tables for Crystallography
(1992, Vol. C, Tables 4.2.6.8 and 6.1.1.4)
;

#==============================================================================

# ATOMIC COORDINATES AND THERMAL PARAMETERS

loop_
_atom_site_label
_atom_site_type_symbol
_atom_site_fract_x
_atom_site_fract_y
_atom_site_fract_z
_atom_site_U_iso_or_equiv
_atom_site_adp_type
_atom_site_occupancy
_atom_site_symmetry_multiplicity
_atom_site_calc_flag
_atom_site_refinement_flags
_atom_site_disorder_assembly
_atom_site_disorder_group
 Zr(1)  Zr -0.11429(3) 0.27279(2)  0.23056(3)  0.0316(1)   Uani 1.00 1 d . . .
 Zr(2)  Zr 0.38228(3)  0.28921(2)  0.20665(3)  0.0359(1)   Uani 1.00 1 d . . .
 Cl(1)  Cl -0.2057(1)  0.20776(8)  0.2207(1)   0.0578(4)   Uani 1.00 1 d . . .
 Cl(2)  Cl -0.21761(9) 0.37389(7)  0.2364(1)   0.0570(4)   Uani 1.00 1 d . . .
 Cl(3)  Cl 0.30910(9)  0.37827(7)  0.2992(1)   0.0568(4)   Uani 1.00 1 d . . .
 Cl(4)  Cl 0.27055(9)  0.24476(8)  0.1756(1)   0.0568(4)   Uani 1.00 1 d . . .
 O(1)   O  -0.0956(2)  0.2706(1)   0.3604(2)   0.0381(9)   Uani 1.00 1 d . . .
 O(2)   O  -0.0963(2)  0.2652(1)   0.1017(2)   0.0328(8)   Uani 1.00 1 d . . .
 O(3)   O  0.3652(2)   0.3359(1)   0.0963(2)   0.0402(9)   Uani 1.00 1 d . . .
 O(4)   O  0.4336(2)   0.2329(2)   0.3040(2)   0.0399(9)   Uani 1.00 1 d . . .
 O(5)   O  0.4889(4)   0.1117(3)   -0.1732(4)  0.096(2)    Uani 1.00 1 d . . .
 N(1)   N  -0.0004(2)  0.1817(2)   0.2477(3)   0.035(1)    Uani 1.00 1 d . . .
 N(2)   N  -0.0159(2)  0.3247(2)   0.2193(2)   0.033(1)    Uani 1.00 1 d . . .
 N(3)   N  0.4639(2)   0.2158(2)   0.1035(3)   0.040(1)    Uani 1.00 1 d . . .
 N(4)   N  0.5026(3)   0.3152(2)   0.2413(3)   0.041(1)    Uani 1.00 1 d . . .
 C(1)   C  -0.0525(3)  0.2751(2)   0.0363(3)   0.028(1)    Uani 1.00 1 d . . .
 C(2)   C  -0.0349(3)  0.2199(2)   0.5834(3)   0.038(1)    Uani 1.00 1 d . . .
 C(3)   C  0.0091(3)   0.3043(2)   0.0594(3)   0.031(1)    Uani 1.00 1 d . . .
 C(4)   C  0.3368(3)   0.3857(2)   -0.0423(3)  0.034(1)    Uani 1.00 1 d . . .
 C(5)   C  -0.1343(3)  0.2279(2)   -0.0796(3)  0.033(1)    Uani 1.00 1 d . . .
 C(6)   C  0.6504(3)   0.1547(2)   0.4435(3)   0.038(1)    Uani 1.00 1 d . . .
 C(7)   C  -0.0571(3)  0.2381(2)   0.4294(3)   0.033(1)    Uani 1.00 1 d . . .
 C(8)   C  0.0559(3)   0.3158(2)   -0.0072(3)  0.036(1)    Uani 1.00 1 d . . .
 C(9)   C  0.0315(3)   0.1667(2)   0.5672(3)   0.036(1)    Uani 1.00 1 d . . .
 C(10)  C  0.0510(3)   0.1481(2)   0.4817(3)   0.037(1)    Uani 1.00 1 d . . .
 C(11)  C  0.5014(3)   0.2089(2)   0.3529(3)   0.033(1)    Uani 1.00 1 d . . .
 C(12)  C  -0.0678(3)  0.2587(2)   -0.0523(3)  0.030(1)    Uani 1.00 1 d . . .
 C(13)  C  0.0214(3)   0.3276(2)   0.1485(3)   0.036(1)    Uani 1.00 1 d . . .
 C(14)  C  0.0883(3)   0.3146(2)   -0.1680(3)  0.040(1)    Uani 1.00 1 d . . .
 C(15)  C  0.5056(3)   0.1615(2)   0.4131(3)   0.033(1)    Uani 1.00 1 d . . .
 C(16)  C  0.0414(3)   0.3013(2)   -0.0951(3)  0.035(1)    Uani 1.00 1 d . . .
 C(17)  C  0.1995(3)   0.4171(2)   0.0277(3)   0.037(1)    Uani 1.00 1 d . . .
 C(18)  C  0.3590(3)   0.3808(2)   -0.1302(3)  0.038(1)    Uani 1.00 1 d . . .
 C(19)  C  0.0770(3)   0.1299(3)   0.6425(3)   0.040(1)    Uani 1.00 1 d . . .
 C(20)  C  0.5810(3)   0.1352(2)   0.4547(3)   0.037(1)    Uani 1.00 1 d . . .
 C(21)  C  0.1295(3)   0.4707(2)   0.0674(4)   0.046(1)    Uani 1.00 1 d . . .
 C(22)  C  -0.0809(3)  0.2571(2)   0.5168(3)   0.035(1)    Uani 1.00 1 d . . .
 C(23)  C  0.4304(3)   0.1415(2)   0.4319(3)   0.038(1)    Uani 1.00 1 d . . .
 C(24)  C  0.4163(3)   0.3301(3)   -0.1703(3)  0.043(1)    Uani 1.00 1 d . . .
 C(25)  C  0.4725(3)   0.2250(2)   0.0209(4)   0.042(1)    Uani 1.00 1 d . . .
 C(26)  C  0.2681(3)   0.4408(2)   -0.0048(3)  0.037(1)    Uani 1.00 1 d . . .
 C(27)  C  0.3993(3)   0.1126(3)   0.3476(4)   0.049(2)    Uani 1.00 1 d . . .
 C(28)  C  -0.0201(3)  0.2732(2)   -0.1146(3)  0.034(1)    Uani 1.00 1 d . . .
 C(29)  C  0.0316(3)   0.1602(2)   0.3227(3)   0.037(1)    Uani 1.00 1 d . . .
 C(30)  C  0.0075(3)   0.1834(2)   0.4110(3)   0.034(1)    Uani 1.00 1 d . . .
 C(31)  C  0.7307(3)   0.1220(2)   0.4874(3)   0.039(1)    Uani 1.00 1 d . . .
 C(32)  C  -0.1567(3)  0.3143(2)   0.5374(3)   0.039(1)    Uani 1.00 1 d . . .
 C(33)  C  0.5630(3)   0.2844(2)   0.2909(4)   0.042(1)    Uani 1.00 1 d . . .
 C(34)  C  0.2281(3)   0.4881(2)   -0.0760(4)  0.042(1)    Uani 1.00 1 d . . .
 C(35)  C  0.5682(3)   0.2308(2)   0.3438(3)   0.036(1)    Uani 1.00 1 d . . .
 C(36)  C  0.0399(3)   0.1456(2)   0.1673(3)   0.044(1)    Uani 1.00 1 d . . .
 C(37)  C  0.4341(3)   0.2808(2)   -0.0287(3)  0.038(1)    Uani 1.00 1 d . . .
 C(38)  C  0.3713(4)   0.0740(3)   0.5214(5)   0.061(2)    Uani 1.00 1 d . . .
 C(39)  C  0.3788(3)   0.3341(2)   0.0098(3)   0.036(1)    Uani 1.00 1 d . . .
 C(40)  C  0.0921(3)   0.5174(3)   -0.0029(4)  0.053(2)    Uani 1.00 1 d . . .
 C(41)  C  0.6424(3)   0.2032(2)   0.3897(3)   0.037(1)    Uani 1.00 1 d . . .
 C(42)  C  0.2995(3)   0.4754(2)   0.0727(4)   0.046(1)    Uani 1.00 1 d . . .
 C(43)  C  -0.1996(4)  0.1807(3)   -0.2081(4)  0.059(2)    Uani 1.00 1 d . . .
 C(44)  C  -0.2200(3)  0.2732(3)   -0.0592(4)  0.054(2)    Uani 1.00 1 d . . .
 C(45)  C  0.4527(3)   0.2788(3)   -0.1181(4)  0.046(1)    Uani 1.00 1 d . . .
 C(46)  C  0.1586(3)   0.5421(2)   -0.0368(4)  0.053(2)    Uani 1.00 1 d . . .
 C(47)  C  0.4483(3)   0.0929(3)   0.5036(4)   0.050(2)    Uani 1.00 1 d . . .
 C(48)  C  -0.1884(5)  0.1366(3)   -0.0605(4)  0.060(2)    Uani 1.00 1 d . . .
 C(49)  C  0.1637(4)   0.5029(3)   0.1441(4)   0.058(2)    Uani 1.00 1 d . . .
 C(50)  C  -0.1326(4)  0.2106(3)   -0.1803(4)  0.049(2)    Uani 1.00 1 d . . .
 C(51)  C  -0.2343(3)  0.3048(3)   0.4903(3)   0.044(1)    Uani 1.00 1 d . . .
 C(52)  C  -0.1730(3)  0.3223(3)   0.6371(3)   0.048(2)    Uani 1.00 1 d . . .
 C(53)  C  -0.1211(4)  0.1663(2)   -0.0325(3)  0.045(1)    Uani 1.00 1 d . . .
 C(54)  C  0.5117(3)   0.1522(2)   0.1339(4)   0.047(1)    Uani 1.00 1 d . . .
 C(55)  C  0.0944(4)   0.1602(3)   0.7205(4)   0.056(2)    Uani 1.00 1 d . . .
 C(56)  C  0.4331(4)   0.3283(3)   -0.2668(4)  0.051(2)    Uani 1.00 1 d . . .
 C(57)  C  0.8093(4)   0.0626(3)   0.6079(4)   0.057(2)    Uani 1.00 1 d . . .
 C(58)  C  0.1731(4)   0.2984(3)   -0.1638(4)  0.050(2)    Uani 1.00 1 d . . .
 C(59)  C  0.7340(4)   0.0939(3)   0.5692(4)   0.049(2)    Uani 1.00 1 d . . .
 C(60)  C  0.1035(4)   0.0647(3)   0.6377(4)   0.053(2)    Uani 1.00 1 d . . .
 C(61)  C  0.8039(3)   0.1183(3)   0.4507(4)   0.049(2)    Uani 1.00 1 d . . .
 C(62)  C  0.2561(3)   0.1524(4)   0.3957(5)   0.071(2)    Uani 1.00 1 d . . .
 C(63)  C  0.0470(4)   0.3408(3)   -0.2442(4)  0.052(2)    Uani 1.00 1 d . . .
 C(64)  C  0.2825(3)   0.1804(3)   0.4818(4)   0.060(2)    Uani 1.00 1 d . . .
 C(65)  C  -0.1449(4)  0.3753(2)   0.5062(4)   0.047(1)    Uani 1.00 1 d . . .
 C(66)  C  0.2285(4)   0.5288(3)   0.1110(4)   0.057(2)    Uani 1.00 1 d . . .
 C(67)  C  -0.2481(4)  0.3784(3)   0.6571(4)   0.060(2)    Uani 1.00 1 d . . .
 C(68)  C  -0.2947(4)  0.4207(3)   0.4789(4)   0.066(2)    Uani 1.00 1 d . . .
 C(69)  C  0.4917(4)   0.0972(3)   0.0822(5)   0.056(2)    Uani 1.00 1 d . . .
 C(70)  C  0.0087(4)   0.3568(3)   0.3017(3)   0.051(2)    Uani 1.00 1 d . . .
 C(71)  C  -0.3237(4)  0.3686(3)   0.6092(4)   0.062(2)    Uani 1.00 1 d . . .
 C(72)  C  -0.2722(5)  0.1837(4)   -0.0394(5)  0.074(2)    Uani 1.00 1 d . . .
 C(73)  C  0.0899(5)   0.3499(4)   -0.3150(4)  0.069(2)    Uani 1.00 1 d . . .
 C(74)  C  0.1327(4)   0.1252(4)   0.7918(4)   0.071(2)    Uani 1.00 1 d . . .
 C(75)  C  -0.1849(4)  0.1205(3)   -0.1597(4)  0.059(2)    Uani 1.00 1 d . . .
 C(76)  C  -0.3096(4)  0.3619(3)   0.5107(4)   0.057(2)    Uani 1.00 1 d . . .
 C(77)  C  0.8804(4)   0.0591(3)   0.5702(5)   0.059(2)    Uani 1.00 1 d . . .
 C(78)  C  0.3229(4)   0.0945(3)   0.3662(5)   0.060(2)    Uani 1.00 1 d . . .
 C(79)  C  0.3428(4)   0.0457(3)   0.4370(5)   0.073(2)    Uani 1.00 1 d . . .
 C(80)  C  0.1434(4)   0.0310(3)   0.7089(5)   0.070(2)    Uani 1.00 1 d . . .
 C(81)  C  0.1732(5)   0.3331(4)   -0.3108(4)  0.076(2)    Uani 1.00 1 d . . .
 C(82)  C  -0.2208(4)  0.4310(3)   0.5269(4)   0.061(2)    Uani 1.00 1 d . . .
 C(83)  C  0.8787(4)   0.0876(3)   0.4917(5)   0.064(2)    Uani 1.00 1 d . . .
 C(84)  C  0.6532(4)   0.0841(3)   0.1759(6)   0.074(2)    Uani 1.00 1 d . . .
 C(85)  C  0.5708(5)   0.3502(5)   0.1209(7)   0.111(4)    Uani 1.00 1 d . . .
 C(86)  C  0.1217(4)   0.1557(3)   0.1550(4)   0.062(2)    Uani 1.00 1 d . . .
 C(87)  C  0.4025(4)   0.1034(3)   0.0802(5)   0.070(2)    Uani 1.00 1 d . . .
 C(88)  C  0.5099(4)   0.3718(3)   0.1999(5)   0.060(2)    Uani 1.00 1 d . . .
 C(89)  C  0.6351(4)   0.0291(3)   0.1283(7)   0.085(3)    Uani 1.00 1 d . . .
 C(90)  C  -0.2819(5)  0.2261(4)   -0.1879(5)  0.077(2)    Uani 1.00 1 d . . .
 C(91)  C  0.3598(3)   0.1991(3)   0.4656(4)   0.048(2)    Uani 1.00 1 d . . .
 C(92)  C  0.6034(4)   0.1452(3)   0.1361(5)   0.055(2)    Uani 1.00 1 d . . .
 C(93)  C  0.1923(4)   0.5754(3)   0.0399(5)   0.067(2)    Uani 1.00 1 d . . .
 C(94)  C  0.1078(5)   0.4087(4)   0.4220(6)   0.084(3)    Uani 1.00 1 d . . .
 C(95)  C  0.5019(5)   0.2874(4)   -0.3038(5)  0.074(2)    Uani 1.00 1 d . . .
 C(96)  C  -0.2858(4)  0.2412(4)   -0.0877(5)  0.072(2)    Uani 1.00 1 d . . .
 C(97)  C  0.2144(4)   0.3080(4)   -0.2366(5)  0.069(2)    Uani 1.00 1 d . . .
 C(98)  C  0.0982(5)   0.3144(4)   0.3375(5)   0.083(3)    Uani 1.00 1 d . . .
 C(99)  C  0.3031(4)   0.1321(4)   0.5538(5)   0.071(2)    Uani 1.00 1 d . . .
 C(100) C  0.0476(5)   0.0761(3)   0.1620(4)   0.069(2)    Uani 1.00 1 d . . .
 C(101) C  -0.2342(5)  0.4370(3)   0.6277(4)   0.069(2)    Uani 1.00 1 d . . .
 C(102) C  0.1569(4)   0.0626(4)   0.7872(5)   0.077(2)    Uani 1.00 1 d . . .
 C(103) C  0.1640(6)   0.0570(4)   0.0605(5)   0.096(3)    Uani 1.00 1 d . . .
 C(104) C  0.5440(4)   0.0372(3)   0.1236(5)   0.067(2)    Uani 1.00 1 d . . .
 C(105) C  0.1578(5)   0.1270(4)   0.0676(5)   0.087(3)    Uani 1.00 1 d . . .
 C(106) C  0.5148(5)   0.2852(4)   -0.3932(5)  0.083(3)    Uani 1.00 1 d . . .
 C(107) C  0.3922(7)   0.3653(5)   -0.4139(5)  0.108(3)    Uani 1.00 1 d . . .
 C(108) C  0.0857(6)   0.0462(4)   0.0750(5)   0.090(3)    Uani 1.00 1 d . . .
 C(109) C  0.4635(6)   0.3239(4)   -0.4465(5)  0.086(3)    Uani 1.00 1 d . . .
 C(110) C  0.4154(7)   0.1296(5)   -0.2231(7)  0.103(4)    Uani 1.00 1 d . . .
 C(111) C  0.3491(7)   0.1513(5)   -0.1612(7)  0.108(4)    Uani 1.00 1 d . . .
 C(112) C  0.4910(7)   0.4349(4)   0.3362(9)   0.122(4)    Uani 1.00 1 d . . .
 C(113) C  0.1160(6)   0.3407(5)   0.4269(6)   0.119(4)    Uani 1.00 1 d . . .
 C(114) C  -0.0289(7)  0.0601(4)   0.1779(7)   0.110(4)    Uani 1.00 1 d . . .
 C(115) C  0.5574(8)   0.0853(6)   -0.2315(8)  0.125(4)    Uani 1.00 1 d . . .
 C(116) C  0.6276(6)   0.0523(5)   -0.1809(9)  0.118(4)    Uani 1.00 1 d . . .
 C(117) C  0.3782(5)   0.3672(4)   -0.3254(5)  0.087(3)    Uani 1.00 1 d . . .
 C(118) C  0.5792(6)   0.4583(5)   0.1273(8)   0.113(4)    Uani 1.00 1 d . . .
 C(119) C  0.5325(8)   0.4194(4)   0.2587(8)   0.113(4)    Uani 1.00 1 d . . .
 C(120) C  -0.0615(9)  0.4606(5)   0.2605(7)   0.153(5)    Uani 1.00 1 d . . .
 C(121) C  0.5631(7)   0.4099(6)   0.0681(9)   0.142(5)    Uani 1.00 1 d . . .
 C(122) C  0.0345(6)   0.4486(5)   0.3868(5)   0.101(3)    Uani 1.00 1 d . . .
 C(123) C  0.0076(7)   0.4226(4)   0.2973(5)   0.101(3)    Uani 1.00 1 d . . .
 C(124) C  0.5297(8)   0.4773(4)   0.2063(9)   0.130(5)    Uani 1.00 1 d . . .
 H(1)   H  0.0938      0.0430      0.5846      0.062       Uiso 1.00 1 c R . .
 H(2)   H  0.1624      -0.0135     0.7040      0.079       Uiso 1.00 1 c R . .
 H(3)   H  0.1815      0.0395      0.8372      0.084       Uiso 1.00 1 c R . .
 H(4)   H  0.1439      0.1464      0.8448      0.078       Uiso 1.00 1 c R . .
 H(5)   H  0.0788      0.2047      0.7251      0.060       Uiso 1.00 1 c R . .
 H(6)   H  0.8106      0.0433      0.6624      0.067       Uiso 1.00 1 c R . .
 H(7)   H  0.6846      0.0965      0.5975      0.058       Uiso 1.00 1 c R . .
 H(8)   H  0.8034      0.1370      0.3958      0.060       Uiso 1.00 1 c R . .
 H(9)   H  0.9313      0.0371      0.5974      0.069       Uiso 1.00 1 c R . .
 H(10)  H  0.9285      0.0864      0.4655      0.078       Uiso 1.00 1 c R . .
 H(11)  H  0.5408      0.2594      -0.2669     0.087       Uiso 1.00 1 c R . .
 H(12)  H  0.5621      0.2554      -0.4168     0.099       Uiso 1.00 1 c R . .
 H(13)  H  0.3538      0.3921      -0.4526     0.122       Uiso 1.00 1 c R . .
 H(14)  H  0.4757      0.3237      -0.5072     0.110       Uiso 1.00 1 c R . .
 H(15)  H  0.3291      0.3956      -0.3033     0.097       Uiso 1.00 1 c R . .
 H(16)  H  0.2024      0.2815      -0.1115     0.061       Uiso 1.00 1 c R . .
 H(17)  H  -0.0111     0.3529      -0.2477     0.065       Uiso 1.00 1 c R . .
 H(18)  H  0.0611      0.3683      -0.3666     0.088       Uiso 1.00 1 c R . .
 H(19)  H  0.2025      0.3381      -0.3602     0.098       Uiso 1.00 1 c R . .
 H(20)  H  0.2725      0.2964      -0.2335     0.087       Uiso 1.00 1 c R . .
 H(21)  H  -0.0495     0.2319      0.6430      0.045       Uiso 1.00 1 c R . .
 H(22)  H  0.0945      0.1110      0.4692      0.044       Uiso 1.00 1 c R . .
 H(23)  H  0.0777      0.1237      0.3189      0.043       Uiso 1.00 1 c R . .
 H(24)  H  0.0983      0.3340      0.0084      0.044       Uiso 1.00 1 c R . .
 H(25)  H  0.0627      0.3480      0.1557      0.044       Uiso 1.00 1 c R . .
 H(26)  H  -0.0303     0.2634      -0.1750     0.042       Uiso 1.00 1 c R . .
 H(27)  H  0.5860      0.1022      0.4933      0.046       Uiso 1.00 1 c R . .
 H(28)  H  0.6101      0.2984      0.2934      0.051       Uiso 1.00 1 c R . .
 H(29)  H  0.6879      0.2183      0.3830      0.045       Uiso 1.00 1 c R . .
 H(30)  H  0.3330      0.4153      -0.1659     0.046       Uiso 1.00 1 c R . .
 H(31)  H  0.5086      0.1910      -0.0114     0.049       Uiso 1.00 1 c R . .
 H(32)  H  0.4909      0.2425      -0.1435     0.055       Uiso 1.00 1 c R . .
 H(33)  H  -0.2233     0.2831      0.0026      0.065       Uiso 1.00 1 c R . .
 H(34)  H  -0.2289     0.3105      -0.0901     0.065       Uiso 1.00 1 c R . .
 H(35)  H  -0.1413     0.2477      -0.2117     0.062       Uiso 1.00 1 c R . .
 H(36)  H  -0.0806     0.1821      -0.1941     0.062       Uiso 1.00 1 c R . .
 H(37)  H  -0.3144     0.1654      -0.0555     0.101       Uiso 1.00 1 c R . .
 H(38)  H  -0.2736     0.1943      0.0223      0.101       Uiso 1.00 1 c R . .
 H(39)  H  -0.2260     0.1014      -0.1776     0.075       Uiso 1.00 1 c R . .
 H(40)  H  -0.1325     0.0926      -0.1734     0.075       Uiso 1.00 1 c R . .
 H(41)  H  -0.2898     0.2632      -0.2189     0.094       Uiso 1.00 1 c R . .
 H(42)  H  -0.3234     0.2075      -0.2060     0.095       Uiso 1.00 1 c R . .
 H(43)  H  -0.1807     0.0995      -0.0297     0.080       Uiso 1.00 1 c R . .
 H(44)  H  -0.1968     0.1709      -0.2700     0.077       Uiso 1.00 1 c R . .
 H(45)  H  -0.3383     0.2693      -0.0748     0.087       Uiso 1.00 1 c R . .
 H(46)  H  -0.0691     0.1379      -0.0469     0.056       Uiso 1.00 1 c R . .
 H(47)  H  -0.1229     0.1751      0.0297      0.056       Uiso 1.00 1 c R . .
 H(48)  H  -0.2266     0.3003      0.4283      0.051       Uiso 1.00 1 c R . .
 H(49)  H  -0.2433     0.2682      0.5104      0.051       Uiso 1.00 1 c R . .
 H(50)  H  -0.0983     0.3821      0.5363      0.056       Uiso 1.00 1 c R . .
 H(51)  H  -0.1367     0.3715      0.4442      0.056       Uiso 1.00 1 c R . .
 H(52)  H  -0.2860     0.4163      0.4171      0.070       Uiso 1.00 1 c R . .
 H(53)  H  -0.3413     0.4557      0.4910      0.070       Uiso 1.00 1 c R . .
 H(54)  H  -0.3332     0.3320      0.6286      0.069       Uiso 1.00 1 c R . .
 H(55)  H  -0.3699     0.4039      0.6215      0.069       Uiso 1.00 1 c R . .
 H(56)  H  -0.2806     0.4718      0.6408      0.078       Uiso 1.00 1 c R . .
 H(57)  H  -0.1871     0.4429      0.6579      0.078       Uiso 1.00 1 c R . .
 H(58)  H  -0.1821     0.2854      0.6563      0.056       Uiso 1.00 1 c R . .
 H(59)  H  -0.1264     0.3287      0.6680      0.056       Uiso 1.00 1 c R . .
 H(60)  H  -0.2563     0.3822      0.7191      0.066       Uiso 1.00 1 c R . .
 H(61)  H  -0.3565     0.3557      0.4804      0.064       Uiso 1.00 1 c R . .
 H(62)  H  -0.2125     0.4683      0.5081      0.069       Uiso 1.00 1 c R . .
 H(63)  H  0.3841      0.0439      0.5657      0.076       Uiso 1.00 1 c R . .
 H(64)  H  0.2398      0.2163      0.5008      0.071       Uiso 1.00 1 c R . .
 H(65)  H  0.3049      0.0769      0.3135      0.078       Uiso 1.00 1 c R . .
 H(66)  H  0.3870      0.1421      0.3025      0.062       Uiso 1.00 1 c R . .
 H(67)  H  0.4410      0.0760      0.3285      0.062       Uiso 1.00 1 c R . .
 H(68)  H  0.4904      0.0565      0.4847      0.061       Uiso 1.00 1 c R . .
 H(69)  H  0.4658      0.1104      0.5566      0.061       Uiso 1.00 1 c R . .
 H(70)  H  0.2079      0.1414      0.4052      0.088       Uiso 1.00 1 c R . .
 H(71)  H  0.2451      0.1823      0.3512      0.088       Uiso 1.00 1 c R . .
 H(72)  H  0.3846      0.0092      0.4175      0.094       Uiso 1.00 1 c R . .
 H(73)  H  0.2949      0.0347      0.4485      0.094       Uiso 1.00 1 c R . .
 H(74)  H  0.3776      0.2155      0.5194      0.058       Uiso 1.00 1 c R . .
 H(75)  H  0.3471      0.2302      0.4227      0.058       Uiso 1.00 1 c R . .
 H(76)  H  0.2557      0.1203      0.5645      0.087       Uiso 1.00 1 c R . .
 H(77)  H  0.3207      0.1495      0.6069      0.087       Uiso 1.00 1 c R . .
 H(78)  H  0.0887      0.4545      0.0879      0.053       Uiso 1.00 1 c R . .
 H(79)  H  0.1354      0.5710      -0.0814     0.060       Uiso 1.00 1 c R . .
 H(80)  H  0.2489      0.5495      0.1591      0.064       Uiso 1.00 1 c R . .
 H(81)  H  0.2217      0.3878      0.0720      0.044       Uiso 1.00 1 c R . .
 H(82)  H  0.1784      0.3972      -0.0206     0.044       Uiso 1.00 1 c R . .
 H(83)  H  0.2682      0.5044      -0.0979     0.051       Uiso 1.00 1 c R . .
 H(84)  H  0.2066      0.4674      -0.1232     0.051       Uiso 1.00 1 c R . .
 H(85)  H  0.0710      0.4971      -0.0507     0.060       Uiso 1.00 1 c R . .
 H(86)  H  0.0491      0.5510      0.0215      0.060       Uiso 1.00 1 c R . .
 H(87)  H  0.3231      0.4468      0.1175      0.054       Uiso 1.00 1 c R . .
 H(88)  H  0.3397      0.4923      0.0523      0.054       Uiso 1.00 1 c R . .
 H(89)  H  0.1207      0.5362      0.1691      0.063       Uiso 1.00 1 c R . .
 H(90)  H  0.1874      0.4735      0.1879      0.063       Uiso 1.00 1 c R . .
 H(91)  H  0.2335      0.5910      0.0192      0.078       Uiso 1.00 1 c R . .
 H(92)  H  0.1493      0.6092      0.0638      0.078       Uiso 1.00 1 c R . .
 H(93)  H  -0.0602     0.4597      0.1978      0.176       Uiso 1.00 1 c R . .
 H(94)  H  -0.0703     0.5024      0.2834      0.176       Uiso 1.00 1 c R . .
 H(95)  H  -0.1048     0.4458      0.2774      0.176       Uiso 1.00 1 c R . .
 H(96)  H  -0.0347     0.0567      0.2393      0.137       Uiso 1.00 1 c R . .
 H(97)  H  -0.0273     0.0215      0.1473      0.137       Uiso 1.00 1 c R . .
 H(98)  H  -0.0741     0.0926      0.1559      0.137       Uiso 1.00 1 c R . .
 H(99)  H  0.4439      0.4698      0.3271      0.148       Uiso 1.00 1 c R . .
 H(100) H  0.5250      0.4454      0.3820      0.147       Uiso 1.00 1 c R . .
 H(101) H  0.4746      0.4003      0.3528      0.147       Uiso 1.00 1 c R . .
 H(102) H  0.3910      0.0827      0.1287      0.085       Uiso 1.00 1 c R . .
 H(103) H  0.3886      0.0847      0.0263      0.085       Uiso 1.00 1 c R . .
 H(104) H  0.3713      0.1464      0.0841      0.085       Uiso 1.00 1 c R . .
 H(105) H  0.0859      0.0579      0.2075      0.081       Uiso 1.00 1 c R . .
 H(106) H  0.4975      0.1503      0.1934      0.054       Uiso 1.00 1 c R . .
 H(107) H  0.0064      0.1626      0.1175      0.049       Uiso 1.00 1 c R . .
 H(108) H  0.4578      0.3922      0.1739      0.074       Uiso 1.00 1 c R . .
 H(109) H  0.6383      0.0855      0.2359      0.085       Uiso 1.00 1 c R . .
 H(110) H  0.7100      0.0797      0.1737      0.085       Uiso 1.00 1 c R . .
 H(111) H  0.6538      0.0263      0.0696      0.096       Uiso 1.00 1 c R . .
 H(112) H  0.6633      -0.0081     0.1573      0.096       Uiso 1.00 1 c R . .
 H(113) H  0.6203      0.1447      0.0771      0.064       Uiso 1.00 1 c R . .
 H(114) H  0.6127      0.1799      0.1690      0.064       Uiso 1.00 1 c R . .
 H(115) H  0.5261      0.0380      0.1823      0.079       Uiso 1.00 1 c R . .
 H(116) H  0.5352      0.0024      0.0905      0.079       Uiso 1.00 1 c R . .
 H(117) H  0.5090      0.0963      0.0232      0.065       Uiso 1.00 1 c R . .
 H(118) H  0.1166      0.4243      0.4801      0.101       Uiso 1.00 1 c R . .
 H(119) H  0.1503      0.4108      0.3853      0.101       Uiso 1.00 1 c R . .
 H(120) H  0.1694      0.3184      0.4479      0.130       Uiso 1.00 1 c R . .
 H(121) H  0.0767      0.3366      0.4665      0.130       Uiso 1.00 1 c R . .
 H(122) H  -0.0077     0.4529      0.4274      0.117       Uiso 1.00 1 c R . .
 H(123) H  0.0411      0.4885      0.3788      0.117       Uiso 1.00 1 c R . .
 H(124) H  -0.0292     0.3572      0.3458      0.066       Uiso 1.00 1 c R . .
 H(125) H  0.0487      0.4218      0.2568      0.115       Uiso 1.00 1 c R . .
 H(126) H  0.6252      0.3335      0.1438      0.136       Uiso 1.00 1 c R . .
 H(127) H  0.5566      0.3192      0.0838      0.137       Uiso 1.00 1 c R . .
 H(128) H  0.6350      0.4440      0.1470      0.144       Uiso 1.00 1 c R . .
 H(129) H  0.5706      0.4945      0.0940      0.144       Uiso 1.00 1 c R . .
 H(130) H  0.6019      0.4004      0.0225      0.179       Uiso 1.00 1 c R . .
 H(131) H  0.5093      0.4243      0.0427      0.179       Uiso 1.00 1 c R . .
 H(132) H  0.5502      0.5055      0.2425      0.159       Uiso 1.00 1 c R . .
 H(133) H  0.4743      0.4975      0.1892      0.159       Uiso 1.00 1 c R . .
 H(134) H  0.5885      0.4012      0.2755      0.143       Uiso 1.00 1 c R . .
 H(135) H  0.0985      0.2721      0.3406      0.100       Uiso 1.00 1 c R . .
 H(136) H  0.1389      0.3164      0.2981      0.100       Uiso 1.00 1 c R . .
 H(137) H  0.1147      0.1995      0.1575      0.072       Uiso 1.00 1 c R . .
 H(138) H  0.1579      0.1368      0.2019      0.071       Uiso 1.00 1 c R . .
 H(139) H  0.1233      0.1478      0.0208      0.100       Uiso 1.00 1 c R . .
 H(140) H  0.2108      0.1315      0.0634      0.100       Uiso 1.00 1 c R . .
 H(141) H  0.0937      0.0024      0.0736      0.095       Uiso 1.00 1 c R . .
 H(142) H  0.0483      0.0644      0.0287      0.095       Uiso 1.00 1 c R . .
 H(143) H  0.1825      0.0405      0.0034      0.098       Uiso 1.00 1 c R . .
 H(144) H  0.2024      0.0360      0.1043      0.098       Uiso 1.00 1 c R . .


loop_
_atom_site_aniso_label
_atom_site_aniso_U_11
_atom_site_aniso_U_22
_atom_site_aniso_U_33
_atom_site_aniso_U_12
_atom_site_aniso_U_13
_atom_site_aniso_U_23
 Zr(1)  0.0330(2)   0.0375(3)   0.0239(2)   -0.0091(2)  0.0037(2)   0.0045(2)  
 Zr(2)  0.0327(2)   0.0340(3)   0.0393(3)   -0.0055(2)  0.0032(2)   0.0108(2)  
 Cl(1)  0.0601(9)   0.080(1)    0.0481(8)   -0.0423(8)  0.0083(7)   0.0048(7)  
 Cl(2)  0.0503(8)   0.0554(8)   0.0493(8)   0.0097(6)   0.0040(6)   0.0101(6)  
 Cl(3)  0.0570(8)   0.0511(8)   0.0542(8)   -0.0024(7)  0.0152(7)   0.0010(6)  
 Cl(4)  0.0435(7)   0.0644(9)   0.0673(9)   -0.0228(7)  0.0009(7)   0.0083(7)  
 O(1)   0.045(2)    0.037(2)    0.029(2)    -0.006(1)   0.004(1)    0.009(1)   
 O(2)   0.034(2)    0.041(2)    0.026(1)    -0.015(1)   0.003(1)    0.003(1)   
 O(3)   0.046(2)    0.031(2)    0.038(2)    -0.001(1)   0.004(2)    0.010(1)   
 O(4)   0.036(2)    0.039(2)    0.046(2)    -0.012(1)   0.003(2)    0.013(2)   
 O(5)   0.114(5)    0.081(4)    0.092(4)    -0.028(3)   -0.006(4)   0.005(3)   
 N(1)   0.041(2)    0.031(2)    0.032(2)    -0.009(2)   0.004(2)    0.002(2)   
 N(2)   0.039(2)    0.035(2)    0.027(2)    -0.014(2)   0.002(2)    -0.001(2)  
 N(3)   0.035(2)    0.029(2)    0.051(2)    -0.003(2)   0.006(2)    0.009(2)   
 N(4)   0.045(2)    0.037(2)    0.045(2)    -0.015(2)   0.008(2)    0.013(2)   
 C(1)   0.030(2)    0.029(2)    0.025(2)    -0.007(2)   0.004(2)    0.003(2)   
 C(2)   0.039(3)    0.047(3)    0.027(2)    -0.013(2)   0.003(2)    0.004(2)   
 C(3)   0.034(2)    0.029(2)    0.031(2)    -0.009(2)   0.006(2)    0.001(2)   
 C(4)   0.032(2)    0.028(2)    0.042(3)    -0.010(2)   0.003(2)    0.005(2)   
 C(5)   0.039(2)    0.035(2)    0.028(2)    -0.015(2)   0.003(2)    0.003(2)   
 C(6)   0.036(2)    0.037(3)    0.040(3)    -0.009(2)   0.004(2)    0.004(2)   
 C(7)   0.035(2)    0.036(2)    0.027(2)    -0.009(2)   -0.000(2)   0.005(2)   
 C(8)   0.036(2)    0.040(3)    0.034(2)    -0.015(2)   0.005(2)    0.003(2)   
 C(9)   0.036(2)    0.040(3)    0.032(2)    -0.011(2)   -0.003(2)   0.008(2)   
 C(10)  0.030(2)    0.039(3)    0.039(3)    -0.008(2)   0.000(2)    0.007(2)   
 C(11)  0.034(2)    0.032(2)    0.033(2)    -0.008(2)   0.003(2)    0.005(2)   
 C(12)  0.034(2)    0.027(2)    0.030(2)    -0.011(2)   0.001(2)    0.004(2)   
 C(13)  0.037(2)    0.042(3)    0.031(2)    -0.015(2)   0.000(2)    0.003(2)   
 C(14)  0.045(3)    0.043(3)    0.039(3)    -0.023(2)   0.013(2)    -0.004(2)  
 C(15)  0.031(2)    0.033(2)    0.038(2)    -0.011(2)   0.005(2)    0.006(2)   
 C(16)  0.040(3)    0.034(2)    0.032(2)    -0.010(2)   0.010(2)    0.001(2)   
 C(17)  0.039(3)    0.030(2)    0.042(3)    -0.007(2)   0.002(2)    0.009(2)   
 C(18)  0.037(3)    0.039(3)    0.039(3)    -0.013(2)   0.003(2)    0.009(2)   
 C(19)  0.030(2)    0.050(3)    0.036(2)    -0.008(2)   -0.001(2)   0.009(2)   
 C(20)  0.032(2)    0.034(2)    0.048(3)    -0.012(2)   0.001(2)    0.013(2)   
 C(21)  0.038(3)    0.038(3)    0.057(3)    0.001(2)    0.007(2)    0.014(2)   
 C(22)  0.034(2)    0.041(3)    0.027(2)    -0.007(2)   0.000(2)    0.002(2)   
 C(23)  0.030(2)    0.036(3)    0.047(3)    -0.006(2)   0.005(2)    0.015(2)   
 C(24)  0.042(3)    0.047(3)    0.041(3)    -0.013(2)   0.007(2)    0.004(2)   
 C(25)  0.038(3)    0.032(2)    0.053(3)    -0.005(2)   0.011(2)    0.005(2)   
 C(26)  0.035(2)    0.030(2)    0.043(3)    -0.006(2)   0.002(2)    0.005(2)   
 C(27)  0.047(3)    0.048(3)    0.060(3)    -0.023(3)   -0.004(3)   0.019(3)   
 C(28)  0.044(3)    0.040(3)    0.022(2)    -0.016(2)   0.003(2)    -0.000(2)  
 C(29)  0.037(3)    0.038(3)    0.032(2)    -0.006(2)   0.002(2)    0.003(2)   
 C(30)  0.036(2)    0.036(2)    0.030(2)    -0.011(2)   0.002(2)    0.003(2)   
 C(31)  0.034(3)    0.038(3)    0.046(3)    -0.013(2)   -0.003(2)   0.002(2)   
 C(32)  0.041(3)    0.043(3)    0.029(2)    -0.008(2)   0.002(2)    0.000(2)   
 C(33)  0.038(3)    0.037(3)    0.053(3)    -0.015(2)   0.008(2)    0.007(2)   
 C(34)  0.042(3)    0.038(3)    0.049(3)    -0.011(2)   0.005(2)    0.015(2)   
 C(35)  0.032(2)    0.036(2)    0.039(2)    -0.008(2)   0.007(2)    0.006(2)   
 C(36)  0.053(3)    0.038(3)    0.031(2)    0.004(2)    0.007(2)    0.002(2)   
 C(37)  0.037(3)    0.037(3)    0.040(3)    -0.008(2)   0.005(2)    0.005(2)   
 C(38)  0.042(3)    0.071(4)    0.077(4)    -0.021(3)   -0.004(3)   0.048(3)   
 C(39)  0.033(2)    0.032(2)    0.041(3)    -0.004(2)   0.004(2)    0.006(2)   
 C(40)  0.037(3)    0.050(3)    0.063(4)    -0.001(2)   -0.004(3)   0.014(3)   
 C(41)  0.032(2)    0.041(3)    0.039(2)    -0.013(2)   0.004(2)    0.002(2)   
 C(42)  0.043(3)    0.037(3)    0.055(3)    -0.010(2)   -0.005(2)   -0.001(2)  
 C(43)  0.070(4)    0.082(4)    0.040(3)    -0.046(4)   -0.008(3)   0.001(3)   
 C(44)  0.037(3)    0.056(3)    0.068(4)    -0.013(3)   -0.001(3)   -0.007(3)  
 C(45)  0.047(3)    0.041(3)    0.050(3)    -0.010(2)   0.009(2)    0.001(2)   
 C(46)  0.048(3)    0.031(3)    0.072(4)    0.005(2)    0.005(3)    0.019(3)   
 C(47)  0.034(3)    0.052(3)    0.067(4)    -0.012(2)   0.002(2)    0.029(3)   
 C(48)  0.100(5)    0.060(4)    0.040(3)    -0.054(4)   -0.001(3)   0.002(3)   
 C(49)  0.058(4)    0.048(3)    0.051(3)    0.012(3)    0.012(3)    -0.002(3)  
 C(50)  0.062(4)    0.054(3)    0.039(3)    -0.029(3)   -0.008(2)   0.010(2)   
 C(51)  0.040(3)    0.054(3)    0.033(2)    -0.007(2)   0.001(2)    0.001(2)   
 C(52)  0.051(3)    0.059(3)    0.029(2)    -0.009(3)   0.001(2)    -0.002(2)  
 C(53)  0.066(4)    0.039(3)    0.036(3)    -0.026(3)   -0.003(2)   0.003(2)   
 C(54)  0.051(3)    0.034(3)    0.051(3)    -0.004(2)   0.008(2)    0.008(2)   
 C(55)  0.048(3)    0.064(4)    0.039(3)    0.006(3)    -0.007(2)   0.002(3)   
 C(56)  0.060(3)    0.057(3)    0.038(3)    -0.021(3)   0.015(3)    0.000(2)   
 C(57)  0.055(4)    0.056(4)    0.055(3)    -0.013(3)   -0.019(3)   0.009(3)   
 C(58)  0.047(3)    0.060(3)    0.045(3)    -0.020(3)   0.009(2)    -0.000(3)  
 C(59)  0.045(3)    0.051(3)    0.050(3)    -0.014(3)   -0.008(2)   0.008(3)   
 C(60)  0.056(3)    0.051(3)    0.049(3)    -0.009(3)   -0.009(3)   0.009(3)   
 C(61)  0.038(3)    0.049(3)    0.064(4)    -0.016(2)   -0.001(3)   0.011(3)   
 C(62)  0.031(3)    0.104(5)    0.085(5)    -0.027(3)   -0.010(3)   0.047(4)   
 C(63)  0.059(4)    0.065(4)    0.038(3)    -0.027(3)   0.003(2)    0.012(3)   
 C(64)  0.034(3)    0.067(4)    0.075(4)    -0.005(3)   0.018(3)    0.028(3)   
 C(65)  0.054(3)    0.042(3)    0.046(3)    -0.015(2)   0.006(2)    -0.001(2)  
 C(66)  0.060(4)    0.040(3)    0.061(4)    -0.001(3)   -0.007(3)   -0.016(3)  
 C(67)  0.065(4)    0.070(4)    0.030(3)    0.001(3)    0.008(3)    -0.009(3)  
 C(68)  0.067(4)    0.056(4)    0.053(4)    0.015(3)    0.004(3)    0.005(3)   
 C(69)  0.052(3)    0.041(3)    0.069(4)    -0.005(3)   0.007(3)    0.005(3)   
 C(70)  0.058(3)    0.078(4)    0.030(2)    -0.041(3)   0.016(2)    -0.013(3)  
 C(71)  0.047(3)    0.078(4)    0.049(3)    0.003(3)    0.016(3)    -0.000(3)  
 C(72)  0.086(5)    0.109(6)    0.058(4)    -0.077(5)   0.017(4)    -0.022(4)  
 C(73)  0.081(5)    0.099(5)    0.041(3)    -0.042(4)   0.009(3)    0.015(3)   
 C(74)  0.062(4)    0.094(6)    0.040(3)    0.000(4)    -0.016(3)   0.003(3)   
 C(75)  0.080(5)    0.058(4)    0.050(3)    -0.037(3)   0.005(3)    -0.013(3)  
 C(76)  0.039(3)    0.075(4)    0.046(3)    -0.003(3)   0.003(2)    -0.005(3)  
 C(77)  0.042(3)    0.054(4)    0.077(4)    -0.011(3)   -0.028(3)   0.007(3)   
 C(78)  0.055(4)    0.063(4)    0.076(4)    -0.037(3)   -0.007(3)   0.017(3)   
 C(79)  0.055(4)    0.071(4)    0.109(6)    -0.035(3)   -0.002(4)   0.043(4)   
 C(80)  0.081(5)    0.054(4)    0.063(4)    -0.003(3)   -0.009(4)   0.022(3)   
 C(81)  0.093(5)    0.109(6)    0.044(4)    -0.052(5)   0.028(4)    0.003(4)   
 C(82)  0.076(4)    0.036(3)    0.060(4)    -0.001(3)   0.012(3)    -0.002(3)  
 C(83)  0.032(3)    0.065(4)    0.097(5)    -0.016(3)   -0.002(3)   0.011(4)   
 C(84)  0.062(4)    0.042(3)    0.108(6)    0.001(3)    -0.011(4)   0.017(4)   
 C(85)  0.077(5)    0.128(8)    0.136(8)    -0.029(5)   0.011(5)    0.093(7)   
 C(86)  0.052(3)    0.077(4)    0.050(3)    -0.009(3)   0.014(3)    -0.007(3)  
 C(87)  0.066(4)    0.054(4)    0.092(5)    -0.023(3)   0.002(4)    -0.002(4)  
 C(88)  0.043(3)    0.055(4)    0.089(5)    -0.018(3)   -0.014(3)   0.036(3)   
 C(89)  0.064(4)    0.033(3)    0.143(8)    0.006(3)    0.005(5)    0.008(4)   
 C(90)  0.071(5)    0.079(5)    0.086(5)    -0.034(4)   -0.029(4)   0.004(4)   
 C(91)  0.044(3)    0.048(3)    0.052(3)    -0.009(2)   0.008(2)    0.015(3)   
 C(92)  0.048(3)    0.040(3)    0.072(4)    -0.004(2)   -0.001(3)   0.005(3)   
 C(93)  0.070(4)    0.024(3)    0.100(5)    -0.002(3)   0.013(4)    -0.000(3)  
 C(94)  0.090(6)    0.081(5)    0.081(5)    -0.027(5)   0.027(5)    -0.020(4)  
 C(95)  0.064(4)    0.094(5)    0.060(4)    -0.015(4)   0.016(3)    -0.004(4)  
 C(96)  0.043(3)    0.074(5)    0.100(5)    -0.025(3)   0.002(3)    -0.020(4)  
 C(97)  0.053(4)    0.102(5)    0.063(4)    -0.043(4)   0.024(3)    -0.015(4)  
 C(98)  0.074(5)    0.118(7)    0.058(4)    -0.037(5)   -0.009(4)   -0.027(4)  
 C(99)  0.046(3)    0.103(5)    0.068(4)    -0.022(4)   0.006(3)    0.040(4)   
 C(100) 0.091(5)    0.059(4)    0.053(4)    -0.016(4)   0.004(4)    -0.007(3)  
 C(101) 0.084(5)    0.055(4)    0.055(4)    -0.003(3)   0.011(3)    -0.020(3)  
 C(102) 0.060(4)    0.093(6)    0.058(4)    0.012(4)    -0.007(3)   0.024(4)   
 C(103) 0.102(7)    0.093(6)    0.050(4)    0.033(5)    0.009(4)    -0.012(4)  
 C(104) 0.067(4)    0.042(3)    0.090(5)    -0.010(3)   0.008(4)    0.009(3)   
 C(105) 0.068(5)    0.123(7)    0.058(4)    -0.010(5)   0.024(4)    0.001(4)   
 C(106) 0.083(5)    0.101(6)    0.064(5)    -0.024(5)   0.033(4)    -0.017(4)  
 C(107) 0.146(9)    0.105(7)    0.054(4)    -0.003(6)   0.027(5)    0.024(4)   
 C(108) 0.112(7)    0.073(5)    0.053(4)    0.014(5)    -0.001(4)   -0.021(4)  
 C(109) 0.135(8)    0.095(6)    0.044(4)    -0.057(6)   0.028(4)    -0.006(4)  
 C(110) 0.100(7)    0.109(7)    0.098(7)    -0.026(6)   -0.016(6)   0.025(6)   
 C(111) 0.105(7)    0.090(6)    0.125(8)    -0.029(6)   -0.025(6)   0.013(6)   
 C(112) 0.14(1)     0.060(5)    0.16(1)     -0.033(6)   -0.020(8)   0.025(6)   
 C(113) 0.101(7)    0.137(9)    0.088(6)    0.001(6)    -0.041(5)   -0.021(6)  
 C(114) 0.16(1)     0.063(5)    0.114(8)    -0.053(6)   0.028(7)    -0.016(5)  
 C(115) 0.130(9)    0.124(9)    0.107(8)    -0.011(7)   0.046(7)    0.005(7)   
 C(116) 0.086(7)    0.112(8)    0.17(1)     -0.045(6)   0.013(7)    0.010(7)   
 C(117) 0.107(6)    0.089(5)    0.046(4)    0.003(5)    0.019(4)    0.013(4)   
 C(118) 0.093(7)    0.111(8)    0.16(1)     -0.056(6)   -0.042(7)   0.071(7)   
 C(119) 0.15(1)     0.066(5)    0.140(9)    -0.055(6)   0.020(8)    0.026(6)   
 C(120) 0.24(1)     0.098(8)    0.101(8)    -0.035(9)   -0.078(9)   0.000(6)   
 C(121) 0.112(9)    0.18(1)     0.16(1)     -0.061(9)   -0.004(8)   0.10(1)    
 C(122) 0.100(7)    0.125(8)    0.067(5)    -0.025(6)   -0.004(5)   -0.043(5)  
 C(123) 0.159(9)    0.064(5)    0.064(5)    -0.017(5)   -0.018(5)   -0.018(4)  
 C(124) 0.15(1)     0.059(5)    0.19(1)     -0.033(6)   -0.006(9)   0.056(7)   

#==============================================================================

_computing_data_collection            'WinAFC'
_computing_cell_refinement            'WinAFC'
_computing_data_reduction             'CrystalStructure'
_computing_structure_solution         'SIR92'
_computing_structure_refinement       'CRYSTALS'
_computing_publication_material       'CrystalStructure 3.6.0'
_computing_molecular_graphics          ?

#==============================================================================

# MOLECULAR GEOMETRY

_geom_special_details
;
    ENTER SPECIAL DETAILS OF THE MOLECULAR GEOMETRY
;

loop_
_geom_bond_atom_site_label_1
_geom_bond_atom_site_label_2
_geom_bond_distance
_geom_bond_publ_flag
_geom_bond_site_symmetry_1
_geom_bond_site_symmetry_2
Zr(1)     Cl(1)     2.437(2)    ?     . .
Zr(1)     Cl(2)     2.415(1)    ?     . .
Zr(1)     O(1)      1.978(3)    ?     . .
Zr(1)     O(2)      1.979(3)    ?     . .
Zr(1)     N(1)      2.375(3)    ?     . .
Zr(1)     N(2)      2.337(5)    ?     . .
Zr(2)     Cl(3)     2.417(1)    ?     . .
Zr(2)     Cl(4)     2.429(2)    ?     . .
Zr(2)     O(3)      1.986(3)    ?     . .
Zr(2)     O(4)      1.989(3)    ?     . .
Zr(2)     N(3)      2.369(4)    ?     . .
Zr(2)     N(4)      2.336(5)    ?     . .
O(1)      C(7)      1.338(5)    ?     . .
O(2)      C(1)      1.337(6)    ?     . .
O(3)      C(39)     1.335(6)    ?     . .
O(4)      C(11)     1.333(5)    ?     . .
O(5)      C(110)    1.40(1)     ?     . .
O(5)      C(115)    1.46(1)     ?     . .
N(1)      C(29)     1.291(6)    ?     . .
N(1)      C(36)     1.496(6)    ?     . .
N(2)      C(13)     1.287(6)    ?     . .
N(2)      C(70)     1.513(7)    ?     . .
N(3)      C(25)     1.301(7)    ?     . .
N(3)      C(54)     1.500(6)    ?     . .
N(4)      C(33)     1.290(6)    ?     . .
N(4)      C(88)     1.489(8)    ?     . .
C(1)      C(3)      1.422(7)    ?     . .
C(1)      C(12)     1.403(6)    ?     . .
C(2)      C(9)      1.395(6)    ?     . .
C(2)      C(22)     1.399(6)    ?     . .
C(3)      C(8)      1.400(7)    ?     . .
C(3)      C(13)     1.449(6)    ?     . .
C(4)      C(18)     1.390(7)    ?     . .
C(4)      C(26)     1.527(6)    ?     . .
C(4)      C(39)     1.423(6)    ?     . .
C(5)      C(12)     1.533(7)    ?     . .
C(5)      C(44)     1.543(7)    ?     . .
C(5)      C(50)     1.550(7)    ?     . .
C(5)      C(53)     1.542(7)    ?     . .
C(6)      C(20)     1.406(8)    ?     . .
C(6)      C(31)     1.494(6)    ?     . .
C(6)      C(41)     1.365(7)    ?     . .
C(7)      C(22)     1.407(6)    ?     . .
C(7)      C(30)     1.403(6)    ?     . .
C(8)      C(16)     1.381(6)    ?     . .
C(9)      C(10)     1.362(7)    ?     . .
C(9)      C(19)     1.490(7)    ?     . .
C(10)     C(30)     1.412(6)    ?     . .
C(11)     C(15)     1.423(7)    ?     . .
C(11)     C(35)     1.391(8)    ?     . .
C(12)     C(28)     1.390(7)    ?     . .
C(14)     C(16)     1.489(8)    ?     . .
C(14)     C(58)     1.387(8)    ?     . .
C(14)     C(63)     1.388(7)    ?     . .
C(15)     C(20)     1.384(6)    ?     . .
C(15)     C(23)     1.530(8)    ?     . .
C(16)     C(28)     1.394(8)    ?     . .
C(17)     C(21)     1.534(6)    ?     . .
C(17)     C(26)     1.539(8)    ?     . .
C(18)     C(24)     1.387(6)    ?     . .
C(19)     C(55)     1.395(8)    ?     . .
C(19)     C(60)     1.393(8)    ?     . .
C(21)     C(40)     1.515(8)    ?     . .
C(21)     C(49)     1.522(9)    ?     . .
C(22)     C(32)     1.553(6)    ?     . .
C(23)     C(27)     1.544(8)    ?     . .
C(23)     C(47)     1.538(8)    ?     . .
C(23)     C(91)     1.556(6)    ?     . .
C(24)     C(45)     1.398(7)    ?     . .
C(24)     C(56)     1.498(8)    ?     . .
C(25)     C(37)     1.456(7)    ?     . .
C(26)     C(34)     1.542(7)    ?     . .
C(26)     C(42)     1.535(8)    ?     . .
C(27)     C(78)     1.53(1)     ?     . .
C(29)     C(30)     1.439(6)    ?     . .
C(31)     C(59)     1.411(8)    ?     . .
C(31)     C(61)     1.372(8)    ?     . .
C(32)     C(51)     1.545(8)    ?     . .
C(32)     C(52)     1.539(7)    ?     . .
C(32)     C(65)     1.544(8)    ?     . .
C(33)     C(35)     1.460(8)    ?     . .
C(34)     C(46)     1.531(7)    ?     . .
C(35)     C(41)     1.404(6)    ?     . .
C(36)     C(86)     1.51(1)     ?     . .
C(36)     C(100)    1.521(9)    ?     . .
C(37)     C(39)     1.397(6)    ?     . .
C(37)     C(45)     1.401(8)    ?     . .
C(38)     C(47)     1.540(9)    ?     . .
C(38)     C(79)     1.52(1)     ?     . .
C(38)     C(99)     1.535(8)    ?     . .
C(40)     C(46)     1.528(9)    ?     . .
C(42)     C(66)     1.532(7)    ?     . .
C(43)     C(50)     1.53(1)     ?     . .
C(43)     C(75)     1.52(1)     ?     . .
C(43)     C(90)     1.500(9)    ?     . .
C(44)     C(96)     1.54(1)     ?     . .
C(46)     C(93)     1.530(9)    ?     . .
C(48)     C(53)     1.53(1)     ?     . .
C(48)     C(72)     1.537(9)    ?     . .
C(48)     C(75)     1.523(8)    ?     . .
C(49)     C(66)     1.52(1)     ?     . .
C(51)     C(76)     1.544(7)    ?     . .
C(52)     C(67)     1.528(8)    ?     . .
C(54)     C(69)     1.541(9)    ?     . .
C(54)     C(92)     1.529(8)    ?     . .
C(55)     C(74)     1.390(9)    ?     . .
C(56)     C(95)     1.374(9)    ?     . .
C(56)     C(117)    1.396(9)    ?     . .
C(57)     C(59)     1.388(8)    ?     . .
C(57)     C(77)     1.348(9)    ?     . .
C(58)     C(97)     1.40(1)     ?     . .
C(60)     C(80)     1.382(9)    ?     . .
C(61)     C(83)     1.394(8)    ?     . .
C(62)     C(64)     1.52(1)     ?     . .
C(62)     C(78)     1.508(8)    ?     . .
C(63)     C(73)     1.39(1)     ?     . .
C(64)     C(91)     1.539(9)    ?     . .
C(64)     C(99)     1.53(1)     ?     . .
C(65)     C(82)     1.535(7)    ?     . .
C(66)     C(93)     1.520(9)    ?     . .
C(67)     C(71)     1.52(1)     ?     . .
C(67)     C(101)    1.50(1)     ?     . .
C(68)     C(76)     1.52(1)     ?     . .
C(68)     C(82)     1.50(1)     ?     . .
C(69)     C(87)     1.49(1)     ?     . .
C(69)     C(104)    1.522(8)    ?     . .
C(70)     C(98)     1.628(9)    ?     . .
C(70)     C(123)    1.47(1)     ?     . .
C(71)     C(76)     1.513(8)    ?     . .
C(72)     C(96)     1.47(1)     ?     . .
C(73)     C(81)     1.36(1)     ?     . .
C(74)     C(102)    1.34(1)     ?     . .
C(77)     C(83)     1.38(1)     ?     . .
C(78)     C(79)     1.53(1)     ?     . .
C(80)     C(102)    1.39(1)     ?     . .
C(81)     C(97)     1.354(9)    ?     . .
C(82)     C(101)    1.547(9)    ?     . .
C(84)     C(89)     1.50(1)     ?     . .
C(84)     C(92)     1.519(8)    ?     . .
C(85)     C(88)     1.58(1)     ?     . .
C(85)     C(121)    1.57(2)     ?     . .
C(86)     C(105)    1.512(9)    ?     . .
C(88)     C(119)    1.48(1)     ?     . .
C(89)     C(104)    1.52(1)     ?     . .
C(90)     C(96)     1.53(1)     ?     . .
C(94)     C(113)    1.49(1)     ?     . .
C(94)     C(122)    1.40(1)     ?     . .
C(95)     C(106)    1.38(1)     ?     . .
C(98)     C(113)    1.50(1)     ?     . .
C(100)    C(108)    1.52(1)     ?     . .
C(100)    C(114)    1.49(2)     ?     . .
C(103)    C(105)    1.54(1)     ?     . .
C(103)    C(108)    1.46(1)     ?     . .
C(106)    C(109)    1.31(1)     ?     . .
C(107)    C(109)    1.38(1)     ?     . .
C(107)    C(117)    1.37(1)     ?     . .
C(110)    C(111)    1.45(2)     ?     . .
C(112)    C(119)    1.37(2)     ?     . .
C(115)    C(116)    1.42(2)     ?     . .
C(118)    C(121)    1.45(2)     ?     . .
C(118)    C(124)    1.47(2)     ?     . .
C(119)    C(124)    1.55(2)     ?     . .
C(120)    C(123)    1.35(1)     ?     . .
C(122)    C(123)    1.55(1)     ?     . .

loop_
_geom_angle_atom_site_label_1
_geom_angle_atom_site_label_2
_geom_angle_atom_site_label_3
_geom_angle
_geom_angle_publ_flag
_geom_angle_site_symmetry_1
_geom_angle_site_symmetry_2
_geom_angle_site_symmetry_3
Cl(2)     Zr(1)     Cl(1)     98.00(6)    ?     . . .
O(1)      Zr(1)     Cl(1)     96.4(1)     ?     . . .
O(2)      Zr(1)     Cl(1)     93.6(1)     ?     . . .
N(1)      Zr(1)     Cl(1)     89.8(1)     ?     . . .
N(2)      Zr(1)     Cl(1)     170.2(1)    ?     . . .
O(1)      Zr(1)     Cl(2)     94.28(9)    ?     . . .
O(2)      Zr(1)     Cl(2)     98.46(9)    ?     . . .
N(1)      Zr(1)     Cl(2)     168.9(1)    ?     . . .
N(2)      Zr(1)     Cl(2)     88.30(9)    ?     . . .
O(2)      Zr(1)     O(1)      162.6(1)    ?     . . .
N(1)      Zr(1)     O(1)      76.9(1)     ?     . . .
N(2)      Zr(1)     O(1)      90.6(1)     ?     . . .
Zr(1)     O(1)      C(7)      147.4(3)    ?     . . .
N(1)      Zr(1)     O(2)      88.9(1)     ?     . . .
N(2)      Zr(1)     O(2)      78.1(1)     ?     . . .
Zr(1)     O(2)      C(1)      146.4(3)    ?     . . .
N(2)      Zr(1)     N(1)      85.1(1)     ?     . . .
Zr(1)     N(1)      C(29)     125.0(3)    ?     . . .
Zr(1)     N(1)      C(36)     119.4(3)    ?     . . .
Zr(1)     N(2)      C(13)     125.7(3)    ?     . . .
Zr(1)     N(2)      C(70)     118.4(3)    ?     . . .
Cl(4)     Zr(2)     Cl(3)     97.84(6)    ?     . . .
O(3)      Zr(2)     Cl(3)     95.1(1)     ?     . . .
O(4)      Zr(2)     Cl(3)     97.0(1)     ?     . . .
N(3)      Zr(2)     Cl(3)     169.1(1)    ?     . . .
N(4)      Zr(2)     Cl(3)     88.7(1)     ?     . . .
O(3)      Zr(2)     Cl(4)     95.2(1)     ?     . . .
O(4)      Zr(2)     Cl(4)     95.4(1)     ?     . . .
N(3)      Zr(2)     Cl(4)     90.1(1)     ?     . . .
N(4)      Zr(2)     Cl(4)     170.6(1)    ?     . . .
O(4)      Zr(2)     O(3)      162.7(1)    ?     . . .
N(3)      Zr(2)     O(3)      76.6(1)     ?     . . .
N(4)      Zr(2)     O(3)      91.0(2)     ?     . . .
Zr(2)     O(3)      C(39)     147.2(3)    ?     . . .
N(3)      Zr(2)     O(4)      89.7(1)     ?     . . .
N(4)      Zr(2)     O(4)      77.0(2)     ?     . . .
Zr(2)     O(4)      C(11)     145.9(4)    ?     . . .
N(4)      Zr(2)     N(3)      84.4(1)     ?     . . .
Zr(2)     N(3)      C(25)     126.2(3)    ?     . . .
Zr(2)     N(3)      C(54)     118.6(3)    ?     . . .
Zr(2)     N(4)      C(33)     126.1(4)    ?     . . .
Zr(2)     N(4)      C(88)     116.0(3)    ?     . . .
O(1)      C(7)      C(22)     121.6(4)    ?     . . .
O(1)      C(7)      C(30)     117.3(4)    ?     . . .
O(2)      C(1)      C(3)      117.5(4)    ?     . . .
O(2)      C(1)      C(12)     121.4(4)    ?     . . .
O(3)      C(39)     C(4)      120.3(4)    ?     . . .
O(3)      C(39)     C(37)     119.1(4)    ?     . . .
O(4)      C(11)     C(15)     120.7(5)    ?     . . .
O(4)      C(11)     C(35)     118.8(4)    ?     . . .
O(5)      C(110)    C(111)    107.3(8)    ?     . . .
C(115)    O(5)      C(110)    109.9(7)    ?     . . .
O(5)      C(115)    C(116)    109.5(9)    ?     . . .
C(36)     N(1)      C(29)     115.6(4)    ?     . . .
N(1)      C(29)     C(30)     129.4(4)    ?     . . .
N(1)      C(36)     C(86)     110.9(5)    ?     . . .
N(1)      C(36)     C(100)    115.8(5)    ?     . . .
C(70)     N(2)      C(13)     115.8(5)    ?     . . .
N(2)      C(13)     C(3)      128.9(5)    ?     . . .
N(2)      C(70)     C(98)     108.9(5)    ?     . . .
N(2)      C(70)     C(123)    118.2(5)    ?     . . .
C(54)     N(3)      C(25)     115.1(4)    ?     . . .
N(3)      C(25)     C(37)     128.6(4)    ?     . . .
N(3)      C(54)     C(69)     114.6(4)    ?     . . .
N(3)      C(54)     C(92)     109.8(5)    ?     . . .
C(88)     N(4)      C(33)     117.9(5)    ?     . . .
N(4)      C(33)     C(35)     128.4(5)    ?     . . .
N(4)      C(88)     C(85)     108.8(5)    ?     . . .
N(4)      C(88)     C(119)    117.4(7)    ?     . . .
C(1)      C(3)      C(13)     122.9(4)    ?     . . .
C(12)     C(1)      C(3)      121.0(4)    ?     . . .
C(1)      C(3)      C(8)      119.3(4)    ?     . . .
C(1)      C(12)     C(5)      122.4(4)    ?     . . .
C(1)      C(12)     C(28)     116.1(5)    ?     . . .
C(22)     C(2)      C(9)      123.8(4)    ?     . . .
C(2)      C(9)      C(10)     118.5(4)    ?     . . .
C(2)      C(9)      C(19)     120.0(4)    ?     . . .
C(2)      C(22)     C(7)      116.3(4)    ?     . . .
C(2)      C(22)     C(32)     122.1(4)    ?     . . .
C(13)     C(3)      C(8)      117.6(5)    ?     . . .
C(3)      C(8)      C(16)     121.0(5)    ?     . . .
C(39)     C(4)      C(18)     115.8(4)    ?     . . .
C(26)     C(4)      C(18)     122.5(4)    ?     . . .
C(4)      C(18)     C(24)     125.5(4)    ?     . . .
C(39)     C(4)      C(26)     121.6(4)    ?     . . .
C(4)      C(26)     C(17)     109.8(4)    ?     . . .
C(4)      C(26)     C(42)     111.4(4)    ?     . . .
C(4)      C(26)     C(34)     111.7(4)    ?     . . .
C(4)      C(39)     C(37)     120.6(4)    ?     . . .
C(44)     C(5)      C(12)     110.4(4)    ?     . . .
C(53)     C(5)      C(12)     111.5(4)    ?     . . .
C(5)      C(12)     C(28)     121.5(4)    ?     . . .
C(50)     C(5)      C(12)     110.8(4)    ?     . . .
C(53)     C(5)      C(44)     109.7(5)    ?     . . .
C(50)     C(5)      C(44)     107.8(4)    ?     . . .
C(5)      C(44)     C(96)     109.4(5)    ?     . . .
C(53)     C(5)      C(50)     106.4(4)    ?     . . .
C(5)      C(50)     C(43)     111.0(5)    ?     . . .
C(5)      C(53)     C(48)     110.5(4)    ?     . . .
C(6)      C(20)     C(15)     123.8(5)    ?     . . .
C(31)     C(6)      C(20)     120.6(5)    ?     . . .
C(41)     C(6)      C(20)     117.9(4)    ?     . . .
C(41)     C(6)      C(31)     121.5(5)    ?     . . .
C(6)      C(31)     C(59)     121.0(5)    ?     . . .
C(6)      C(31)     C(61)     121.7(5)    ?     . . .
C(6)      C(41)     C(35)     121.0(5)    ?     . . .
C(30)     C(7)      C(22)     121.1(4)    ?     . . .
C(7)      C(22)     C(32)     121.5(4)    ?     . . .
C(7)      C(30)     C(29)     123.3(4)    ?     . . .
C(7)      C(30)     C(10)     119.4(4)    ?     . . .
C(8)      C(16)     C(28)     117.6(5)    ?     . . .
C(8)      C(16)     C(14)     122.5(5)    ?     . . .
C(9)      C(10)     C(30)     120.9(4)    ?     . . .
C(19)     C(9)      C(10)     121.4(4)    ?     . . .
C(9)      C(19)     C(55)     120.6(5)    ?     . . .
C(9)      C(19)     C(60)     121.7(5)    ?     . . .
C(10)     C(30)     C(29)     117.3(4)    ?     . . .
C(11)     C(15)     C(23)     121.6(4)    ?     . . .
C(35)     C(11)     C(15)     120.4(4)    ?     . . .
C(11)     C(15)     C(20)     116.5(5)    ?     . . .
C(11)     C(35)     C(33)     121.9(4)    ?     . . .
C(11)     C(35)     C(41)     120.1(5)    ?     . . .
C(12)     C(28)     C(16)     124.9(4)    ?     . . .
C(14)     C(16)     C(28)     119.9(4)    ?     . . .
C(58)     C(14)     C(16)     121.5(5)    ?     . . .
C(63)     C(14)     C(16)     119.7(5)    ?     . . .
C(63)     C(14)     C(58)     118.7(5)    ?     . . .
C(14)     C(58)     C(97)     119.1(5)    ?     . . .
C(14)     C(63)     C(73)     120.6(6)    ?     . . .
C(23)     C(15)     C(20)     121.9(5)    ?     . . .
C(15)     C(23)     C(27)     111.1(4)    ?     . . .
C(15)     C(23)     C(91)     110.2(4)    ?     . . .
C(15)     C(23)     C(47)     112.3(4)    ?     . . .
C(26)     C(17)     C(21)     111.8(4)    ?     . . .
C(17)     C(21)     C(40)     109.3(4)    ?     . . .
C(17)     C(21)     C(49)     108.9(4)    ?     . . .
C(17)     C(26)     C(42)     108.9(4)    ?     . . .
C(17)     C(26)     C(34)     106.2(4)    ?     . . .
C(18)     C(24)     C(45)     116.9(5)    ?     . . .
C(18)     C(24)     C(56)     121.3(5)    ?     . . .
C(60)     C(19)     C(55)     117.7(5)    ?     . . .
C(19)     C(55)     C(74)     119.8(6)    ?     . . .
C(19)     C(60)     C(80)     121.2(6)    ?     . . .
C(21)     C(40)     C(46)     109.1(5)    ?     . . .
C(49)     C(21)     C(40)     109.6(5)    ?     . . .
C(21)     C(49)     C(66)     109.6(5)    ?     . . .
C(22)     C(32)     C(51)     110.3(4)    ?     . . .
C(22)     C(32)     C(65)     111.1(4)    ?     . . .
C(22)     C(32)     C(52)     111.1(4)    ?     . . .
C(91)     C(23)     C(27)     108.4(4)    ?     . . .
C(47)     C(23)     C(27)     107.7(5)    ?     . . .
C(23)     C(27)     C(78)     110.8(5)    ?     . . .
C(91)     C(23)     C(47)     107.0(4)    ?     . . .
C(23)     C(47)     C(38)     111.0(4)    ?     . . .
C(23)     C(91)     C(64)     111.0(5)    ?     . . .
C(24)     C(45)     C(37)     120.7(4)    ?     . . .
C(56)     C(24)     C(45)     121.6(4)    ?     . . .
C(24)     C(56)     C(117)    121.7(5)    ?     . . .
C(24)     C(56)     C(95)     122.6(5)    ?     . . .
C(25)     C(37)     C(39)     122.0(5)    ?     . . .
C(25)     C(37)     C(45)     117.7(4)    ?     . . .
C(42)     C(26)     C(34)     108.7(4)    ?     . . .
C(26)     C(34)     C(46)     110.4(4)    ?     . . .
C(26)     C(42)     C(66)     110.2(4)    ?     . . .
C(27)     C(78)     C(62)     109.0(6)    ?     . . .
C(27)     C(78)     C(79)     109.9(5)    ?     . . .
C(61)     C(31)     C(59)     117.3(5)    ?     . . .
C(31)     C(59)     C(57)     119.9(6)    ?     . . .
C(31)     C(61)     C(83)     121.6(6)    ?     . . .
C(65)     C(32)     C(51)     108.6(4)    ?     . . .
C(52)     C(32)     C(51)     106.9(4)    ?     . . .
C(32)     C(51)     C(76)     110.2(5)    ?     . . .
C(65)     C(32)     C(52)     108.8(4)    ?     . . .
C(32)     C(52)     C(67)     111.0(4)    ?     . . .
C(32)     C(65)     C(82)     110.0(5)    ?     . . .
C(33)     C(35)     C(41)     118.0(5)    ?     . . .
C(34)     C(46)     C(40)     110.4(5)    ?     . . .
C(34)     C(46)     C(93)     109.7(5)    ?     . . .
C(100)    C(36)     C(86)     110.9(5)    ?     . . .
C(36)     C(86)     C(105)    111.5(6)    ?     . . .
C(36)     C(100)    C(114)    115.8(6)    ?     . . .
C(36)     C(100)    C(108)    110.0(6)    ?     . . .
C(45)     C(37)     C(39)     120.4(4)    ?     . . .
C(79)     C(38)     C(47)     109.8(6)    ?     . . .
C(99)     C(38)     C(47)     109.4(6)    ?     . . .
C(38)     C(79)     C(78)     108.6(6)    ?     . . .
C(99)     C(38)     C(79)     109.9(5)    ?     . . .
C(38)     C(99)     C(64)     109.0(5)    ?     . . .
C(40)     C(46)     C(93)     109.1(5)    ?     . . .
C(42)     C(66)     C(49)     110.1(5)    ?     . . .
C(42)     C(66)     C(93)     109.2(5)    ?     . . .
C(75)     C(43)     C(50)     109.2(5)    ?     . . .
C(90)     C(43)     C(50)     109.5(6)    ?     . . .
C(43)     C(75)     C(48)     108.5(5)    ?     . . .
C(90)     C(43)     C(75)     111.2(6)    ?     . . .
C(43)     C(90)     C(96)     108.8(5)    ?     . . .
C(44)     C(96)     C(72)     110.0(6)    ?     . . .
C(44)     C(96)     C(90)     109.1(6)    ?     . . .
C(46)     C(93)     C(66)     108.8(5)    ?     . . .
C(72)     C(48)     C(53)     109.0(5)    ?     . . .
C(75)     C(48)     C(53)     109.6(6)    ?     . . .
C(75)     C(48)     C(72)     109.3(5)    ?     . . .
C(48)     C(72)     C(96)     110.7(6)    ?     . . .
C(49)     C(66)     C(93)     110.5(5)    ?     . . .
C(51)     C(76)     C(68)     109.2(5)    ?     . . .
C(51)     C(76)     C(71)     109.8(5)    ?     . . .
C(52)     C(67)     C(71)     110.0(5)    ?     . . .
C(52)     C(67)     C(101)    109.6(6)    ?     . . .
C(54)     C(69)     C(87)     112.6(5)    ?     . . .
C(92)     C(54)     C(69)     112.2(4)    ?     . . .
C(54)     C(69)     C(104)    107.1(5)    ?     . . .
C(54)     C(92)     C(84)     111.3(6)    ?     . . .
C(55)     C(74)     C(102)    122.0(6)    ?     . . .
C(117)    C(56)     C(95)     115.7(6)    ?     . . .
C(56)     C(95)     C(106)    121.6(6)    ?     . . .
C(56)     C(117)    C(107)    122.3(7)    ?     . . .
C(77)     C(57)     C(59)     121.7(6)    ?     . . .
C(57)     C(77)     C(83)     119.3(5)    ?     . . .
C(58)     C(97)     C(81)     121.4(7)    ?     . . .
C(60)     C(80)     C(102)    119.8(6)    ?     . . .
C(61)     C(83)     C(77)     120.0(6)    ?     . . .
C(62)     C(64)     C(91)     108.8(5)    ?     . . .
C(78)     C(62)     C(64)     110.0(5)    ?     . . .
C(62)     C(64)     C(99)     110.5(6)    ?     . . .
C(62)     C(78)     C(79)     110.9(6)    ?     . . .
C(63)     C(73)     C(81)     120.3(6)    ?     . . .
C(99)     C(64)     C(91)     108.4(5)    ?     . . .
C(65)     C(82)     C(68)     109.5(5)    ?     . . .
C(65)     C(82)     C(101)    109.4(5)    ?     . . .
C(67)     C(71)     C(76)     108.7(5)    ?     . . .
C(101)    C(67)     C(71)     109.8(5)    ?     . . .
C(67)     C(101)    C(82)     109.5(5)    ?     . . .
C(68)     C(76)     C(71)     110.2(6)    ?     . . .
C(82)     C(68)     C(76)     109.7(5)    ?     . . .
C(68)     C(82)     C(101)    109.5(6)    ?     . . .
C(104)    C(69)     C(87)     112.8(6)    ?     . . .
C(69)     C(104)    C(89)     114.7(6)    ?     . . .
C(123)    C(70)     C(98)     110.0(7)    ?     . . .
C(70)     C(98)     C(113)    108.6(6)    ?     . . .
C(70)     C(123)    C(120)    114(1)      ?     . . .
C(70)     C(123)    C(122)    111.9(7)    ?     . . .
C(72)     C(96)     C(90)     110.5(6)    ?     . . .
C(73)     C(81)     C(97)     119.9(7)    ?     . . .
C(74)     C(102)    C(80)     119.4(6)    ?     . . .
C(92)     C(84)     C(89)     111.2(6)    ?     . . .
C(84)     C(89)     C(104)    111.4(5)    ?     . . .
C(85)     C(88)     C(119)    110.5(8)    ?     . . .
C(121)    C(85)     C(88)     106.8(7)    ?     . . .
C(85)     C(121)    C(118)    109(1)      ?     . . .
C(86)     C(105)    C(103)    109.9(7)    ?     . . .
C(88)     C(119)    C(112)    115(1)      ?     . . .
C(88)     C(119)    C(124)    110.3(9)    ?     . . .
C(94)     C(113)    C(98)     110.0(8)    ?     . . .
C(122)    C(94)     C(113)    118.5(9)    ?     . . .
C(94)     C(122)    C(123)    112.7(8)    ?     . . .
C(95)     C(106)    C(109)    121.5(7)    ?     . . .
C(114)    C(100)    C(108)    111.7(7)    ?     . . .
C(100)    C(108)    C(103)    113.1(7)    ?     . . .
C(108)    C(103)    C(105)    112.4(7)    ?     . . .
C(106)    C(109)    C(107)    119.8(7)    ?     . . .
C(117)    C(107)    C(109)    119.1(8)    ?     . . .
C(112)    C(119)    C(124)    112.9(8)    ?     . . .
C(124)    C(118)    C(121)    117(1)      ?     . . .
C(118)    C(124)    C(119)    110.5(8)    ?     . . .
C(120)    C(123)    C(122)    114.2(8)    ?     . . .

loop_
_geom_contact_atom_site_label_1
_geom_contact_atom_site_label_2
_geom_contact_distance
_geom_contact_publ_flag
_geom_contact_site_symmetry_1
_geom_contact_site_symmetry_2
Zr(1)     C(1)      3.179(4)    ?     . .
Zr(1)     C(7)      3.188(4)    ?     . .
Zr(1)     C(13)     3.261(6)    ?     . .
Zr(1)     C(29)     3.290(4)    ?     . .
Zr(1)     C(36)     3.372(5)    ?     . .
Zr(1)     C(70)     3.334(7)    ?     . .
Zr(2)     C(11)     3.181(4)    ?     . .
Zr(2)     C(25)     3.309(5)    ?     . .
Zr(2)     C(33)     3.266(5)    ?     . .
Zr(2)     C(39)     3.191(5)    ?     . .
Zr(2)     C(54)     3.357(5)    ?     . .
Zr(2)     C(88)     3.274(7)    ?     . .
Cl(1)     O(1)      3.304(4)    ?     . .
Cl(1)     O(2)      3.233(4)    ?     . .
Cl(1)     N(1)      3.395(4)    ?     . .
Cl(2)     O(1)      3.234(3)    ?     . .
Cl(2)     O(2)      3.340(3)    ?     . .
Cl(2)     N(2)      3.311(4)    ?     . .
Cl(3)     O(3)      3.263(4)    ?     . .
Cl(3)     O(4)      3.311(3)    ?     . .
Cl(3)     N(4)      3.322(4)    ?     . .
Cl(4)     O(3)      3.273(4)    ?     . .
Cl(4)     O(4)      3.281(4)    ?     . .
Cl(4)     N(3)      3.396(4)    ?     . .
Cl(4)     C(87)     3.558(6)    ?     . .
O(1)      N(1)      2.726(5)    ?     . .
O(1)      N(2)      3.077(6)    ?     . .
O(1)      C(22)     2.397(5)    ?     . .
O(1)      C(29)     2.807(5)    ?     . .
O(1)      C(30)     2.341(5)    ?     . .
O(1)      C(32)     2.927(6)    ?     . .
O(1)      C(51)     3.042(6)    ?     . .
O(1)      C(65)     3.077(6)    ?     . .
O(1)      C(70)     3.186(8)    ?     . .
O(2)      N(1)      3.061(5)    ?     . .
O(2)      N(2)      2.733(5)    ?     . .
O(2)      C(3)      2.359(7)    ?     . .
O(2)      C(5)      2.925(5)    ?     . .
O(2)      C(12)     2.390(5)    ?     . .
O(2)      C(13)     2.829(7)    ?     . .
O(2)      C(36)     3.149(5)    ?     . .
O(2)      C(44)     3.131(7)    ?     . .
O(2)      C(53)     3.032(6)    ?     . .
O(3)      N(3)      2.715(5)    ?     . .
O(3)      N(4)      3.091(5)    ?     . .
O(3)      C(4)      2.393(6)    ?     . .
O(3)      C(17)     3.043(5)    ?     . .
O(3)      C(25)     2.819(5)    ?     . .
O(3)      C(26)     2.906(5)    ?     . .
O(3)      C(37)     2.355(6)    ?     . .
O(3)      C(42)     3.022(6)    ?     . .
O(3)      C(88)     3.156(8)    ?     . .
O(4)      N(3)      3.086(6)    ?     . .
O(4)      N(4)      2.705(6)    ?     . .
O(4)      C(15)     2.395(6)    ?     . .
O(4)      C(23)     2.913(7)    ?     . .
O(4)      C(27)     3.043(8)    ?     . .
O(4)      C(33)     2.810(7)    ?     . .
O(4)      C(35)     2.345(6)    ?     . .
O(4)      C(54)     3.164(6)    ?     . .
O(4)      C(91)     3.039(7)    ?     . .
O(5)      C(111)    2.30(1)     ?     . .
O(5)      C(116)    2.35(1)     ?     . .
N(1)      N(2)      3.187(6)    ?     . .
N(1)      C(7)      3.033(6)    ?     . .
N(1)      C(30)     2.468(6)    ?     . .
N(1)      C(86)     2.473(7)    ?     . .
N(1)      C(100)    2.555(8)    ?     . .
N(1)      C(114)    3.04(1)     ?     . .
N(2)      C(1)      3.036(6)    ?     . .
N(2)      C(3)      2.469(6)    ?     . .
N(2)      C(98)     2.556(8)    ?     . .
N(2)      C(120)    2.94(1)     ?     . .
N(2)      C(123)    2.56(1)     ?     . .
N(3)      N(4)      3.161(6)    ?     . .
N(3)      C(37)     2.485(7)    ?     . .
N(3)      C(39)     3.011(6)    ?     . .
N(3)      C(69)     2.560(7)    ?     . .
N(3)      C(87)     3.008(9)    ?     . .
N(3)      C(92)     2.478(6)    ?     . .
N(4)      C(11)     3.004(7)    ?     . .
N(4)      C(35)     2.478(6)    ?     . .
N(4)      C(85)     2.49(1)     ?     . .
N(4)      C(112)    2.93(1)     ?     . .
N(4)      C(119)    2.54(1)     ?     . .
C(1)      C(5)      2.574(7)    ?     . .
C(1)      C(8)      2.435(8)    ?     . .
C(1)      C(13)     2.522(7)    ?     . .
C(1)      C(16)     2.808(7)    ?     . .
C(1)      C(28)     2.370(6)    ?     . .
C(1)      C(36)     3.528(6)    ?     . .
C(1)      C(44)     3.165(7)    ?     . .
C(1)      C(53)     3.122(8)    ?     . .
C(2)      C(7)      2.383(6)    ?     . .
C(2)      C(10)     2.369(6)    ?     . .
C(2)      C(19)     2.499(6)    ?     . .
C(2)      C(30)     2.752(6)    ?     . .
C(2)      C(32)     2.584(6)    ?     . .
C(2)      C(52)     2.862(7)    ?     . .
C(2)      C(55)     3.018(7)    ?     . .
C(3)      C(12)     2.459(7)    ?     . .
C(3)      C(16)     2.421(6)    ?     . .
C(3)      C(28)     2.748(6)    ?     . .
C(4)      C(17)     2.508(7)    ?     . .
C(4)      C(24)     2.469(7)    ?     . .
C(4)      C(34)     2.540(6)    ?     . .
C(4)      C(37)     2.449(6)    ?     . .
C(4)      C(42)     2.531(7)    ?     . .
C(4)      C(45)     2.830(6)    ?     . .
C(5)      C(28)     2.550(8)    ?     . .
C(5)      C(43)     2.538(8)    ?     . .
C(5)      C(48)     2.52(1)     ?     . .
C(5)      C(72)     2.92(1)     ?     . .
C(5)      C(75)     2.976(9)    ?     . .
C(5)      C(90)     2.960(9)    ?     . .
C(5)      C(96)     2.519(9)    ?     . .
C(6)      C(11)     2.804(6)    ?     . .
C(6)      C(15)     2.462(7)    ?     . .
C(6)      C(35)     2.410(6)    ?     . .
C(6)      C(59)     2.529(7)    ?     . .
C(6)      C(61)     2.504(7)    ?     . .
C(7)      C(9)      2.800(6)    ?     . .
C(7)      C(10)     2.430(6)    ?     . .
C(7)      C(29)     2.501(6)    ?     . .
C(7)      C(32)     2.583(6)    ?     . .
C(7)      C(51)     3.106(7)    ?     . .
C(7)      C(65)     3.166(7)    ?     . .
C(8)      C(12)     2.830(8)    ?     . .
C(8)      C(13)     2.437(6)    ?     . .
C(8)      C(14)     2.517(7)    ?     . .
C(8)      C(28)     2.373(7)    ?     . .
C(8)      C(58)     3.107(8)    ?     . .
C(9)      C(22)     2.464(6)    ?     . .
C(9)      C(30)     2.412(6)    ?     . .
C(9)      C(55)     2.507(7)    ?     . .
C(9)      C(60)     2.518(7)    ?     . .
C(10)     C(19)     2.488(7)    ?     . .
C(10)     C(22)     2.823(6)    ?     . .
C(10)     C(29)     2.434(7)    ?     . .
C(10)     C(60)     3.029(8)    ?     . .
C(11)     C(20)     2.387(6)    ?     . .
C(11)     C(23)     2.578(8)    ?     . .
C(11)     C(27)     3.160(9)    ?     . .
C(11)     C(33)     2.492(8)    ?     . .
C(11)     C(41)     2.421(7)    ?     . .
C(11)     C(54)     3.474(7)    ?     . .
C(11)     C(91)     3.096(8)    ?     . .
C(12)     C(16)     2.468(8)    ?     . .
C(12)     C(44)     2.526(7)    ?     . .
C(12)     C(50)     2.538(8)    ?     . .
C(12)     C(53)     2.542(8)    ?     . .
C(13)     C(70)     2.375(7)    ?     . .
C(13)     C(98)     3.085(8)    ?     . .
C(13)     C(120)    3.29(1)     ?     . .
C(13)     C(123)    2.975(9)    ?     . .
C(14)     C(28)     2.496(8)    ?     . .
C(14)     C(73)     2.409(8)    ?     . .
C(14)     C(81)     2.78(1)     ?     . .
C(14)     C(97)     2.400(9)    ?     . .
C(15)     C(27)     2.534(8)    ?     . .
C(15)     C(35)     2.442(8)    ?     . .
C(15)     C(41)     2.816(8)    ?     . .
C(15)     C(47)     2.548(9)    ?     . .
C(15)     C(91)     2.532(7)    ?     . .
C(16)     C(58)     2.510(8)    ?     . .
C(16)     C(63)     2.488(7)    ?     . .
C(17)     C(18)     3.587(7)    ?     . .
C(17)     C(34)     2.463(8)    ?     . .
C(17)     C(39)     3.085(6)    ?     . .
C(17)     C(40)     2.488(7)    ?     . .
C(17)     C(42)     2.501(8)    ?     . .
C(17)     C(46)     2.891(7)    ?     . .
C(17)     C(49)     2.486(7)    ?     . .
C(17)     C(66)     2.906(8)    ?     . .
C(17)     C(93)     3.508(8)    ?     . .
C(18)     C(26)     2.559(7)    ?     . .
C(18)     C(34)     2.856(6)    ?     . .
C(18)     C(37)     2.741(7)    ?     . .
C(18)     C(39)     2.383(7)    ?     . .
C(18)     C(45)     2.373(7)    ?     . .
C(18)     C(56)     2.515(7)    ?     . .
C(18)     C(117)    2.976(8)    ?     . .
C(19)     C(74)     2.409(8)    ?     . .
C(19)     C(80)     2.417(8)    ?     . .
C(19)     C(102)    2.794(9)    ?     . .
C(20)     C(23)     2.549(7)    ?     . .
C(20)     C(31)     2.520(7)    ?     . .
C(20)     C(35)     2.748(7)    ?     . .
C(20)     C(41)     2.374(8)    ?     . .
C(20)     C(47)     2.857(8)    ?     . .
C(20)     C(59)     3.005(7)    ?     . .
C(21)     C(26)     2.544(7)    ?     . .
C(21)     C(34)     2.924(8)    ?     . .
C(21)     C(42)     2.943(8)    ?     . .
C(21)     C(46)     2.479(9)    ?     . .
C(21)     C(66)     2.481(9)    ?     . .
C(21)     C(93)     2.920(9)    ?     . .
C(22)     C(30)     2.446(6)    ?     . .
C(22)     C(51)     2.542(7)    ?     . .
C(22)     C(52)     2.550(7)    ?     . .
C(22)     C(65)     2.553(7)    ?     . .
C(23)     C(38)     2.537(9)    ?     . .
C(23)     C(62)     2.949(8)    ?     . .
C(23)     C(64)     2.551(7)    ?     . .
C(23)     C(78)     2.527(9)    ?     . .
C(23)     C(79)     2.98(1)     ?     . .
C(23)     C(99)     2.982(9)    ?     . .
C(24)     C(37)     2.432(7)    ?     . .
C(24)     C(39)     2.820(7)    ?     . .
C(24)     C(95)     2.520(9)    ?     . .
C(24)     C(117)    2.528(9)    ?     . .
C(25)     C(39)     2.494(6)    ?     . .
C(25)     C(45)     2.444(8)    ?     . .
C(25)     C(54)     2.366(8)    ?     . .
C(25)     C(69)     2.982(8)    ?     . .
C(25)     C(87)     3.47(1)     ?     . .
C(25)     C(92)     2.973(7)    ?     . .
C(26)     C(39)     2.576(6)    ?     . .
C(26)     C(40)     2.983(7)    ?     . .
C(26)     C(46)     2.524(6)    ?     . .
C(26)     C(49)     2.953(8)    ?     . .
C(26)     C(66)     2.515(7)    ?     . .
C(26)     C(93)     2.952(7)    ?     . .
C(27)     C(38)     2.920(9)    ?     . .
C(27)     C(47)     2.488(8)    ?     . .
C(27)     C(62)     2.471(8)    ?     . .
C(27)     C(64)     2.934(8)    ?     . .
C(27)     C(79)     2.50(1)     ?     . .
C(27)     C(91)     2.515(8)    ?     . .
C(27)     C(99)     3.538(9)    ?     . .
C(28)     C(44)     3.563(8)    ?     . .
C(28)     C(50)     2.825(9)    ?     . .
C(28)     C(63)     3.012(8)    ?     . .
C(29)     C(36)     2.361(7)    ?     . .
C(29)     C(86)     3.011(8)    ?     . .
C(29)     C(100)    2.962(8)    ?     . .
C(29)     C(114)    3.40(1)     ?     . .
C(31)     C(41)     2.495(7)    ?     . .
C(31)     C(57)     2.424(8)    ?     . .
C(31)     C(77)     2.802(7)    ?     . .
C(31)     C(83)     2.415(8)    ?     . .
C(32)     C(67)     2.529(7)    ?     . .
C(32)     C(68)     2.947(7)    ?     . .
C(32)     C(71)     2.978(8)    ?     . .
C(32)     C(76)     2.533(7)    ?     . .
C(32)     C(82)     2.522(7)    ?     . .
C(32)     C(101)    2.952(8)    ?     . .
C(33)     C(41)     2.455(7)    ?     . .
C(33)     C(85)     3.07(1)     ?     . .
C(33)     C(88)     2.383(8)    ?     . .
C(33)     C(112)    3.27(1)     ?     . .
C(33)     C(119)    2.98(1)     ?     . .
C(34)     C(40)     2.511(8)    ?     . .
C(34)     C(42)     2.502(8)    ?     . .
C(34)     C(49)     3.525(8)    ?     . .
C(34)     C(66)     2.926(8)    ?     . .
C(34)     C(93)     2.504(8)    ?     . .
C(35)     C(92)     3.566(8)    ?     . .
C(36)     C(103)    2.908(9)    ?     . .
C(36)     C(105)    2.49(1)     ?     . .
C(36)     C(108)    2.493(9)    ?     . .
C(36)     C(114)    2.55(1)     ?     . .
C(38)     C(62)     2.923(9)    ?     . .
C(38)     C(64)     2.497(9)    ?     . .
C(38)     C(78)     2.48(1)     ?     . .
C(38)     C(91)     2.921(9)    ?     . .
C(39)     C(42)     3.154(7)    ?     . .
C(39)     C(45)     2.427(7)    ?     . .
C(40)     C(42)     3.540(8)    ?     . .
C(40)     C(49)     2.481(8)    ?     . .
C(40)     C(66)     2.906(9)    ?     . .
C(40)     C(93)     2.49(1)     ?     . .
C(41)     C(61)     2.983(7)    ?     . .
C(42)     C(46)     2.922(7)    ?     . .
C(42)     C(49)     2.498(8)    ?     . .
C(42)     C(93)     2.488(7)    ?     . .
C(43)     C(44)     2.932(9)    ?     . .
C(43)     C(48)     2.470(9)    ?     . .
C(43)     C(53)     2.914(8)    ?     . .
C(43)     C(72)     2.88(1)     ?     . .
C(43)     C(96)     2.467(9)    ?     . .
C(44)     C(48)     2.941(9)    ?     . .
C(44)     C(50)     2.499(8)    ?     . .
C(44)     C(53)     2.522(7)    ?     . .
C(44)     C(72)     2.47(1)     ?     . .
C(44)     C(75)     3.553(9)    ?     . .
C(44)     C(90)     2.51(1)     ?     . .
C(45)     C(56)     2.529(8)    ?     . .
C(45)     C(95)     3.005(9)    ?     . .
C(46)     C(49)     2.914(9)    ?     . .
C(46)     C(66)     2.480(9)    ?     . .
C(47)     C(62)     3.519(8)    ?     . .
C(47)     C(64)     2.937(7)    ?     . .
C(47)     C(78)     2.915(9)    ?     . .
C(47)     C(79)     2.50(1)     ?     . .
C(47)     C(91)     2.487(7)    ?     . .
C(47)     C(99)     2.510(8)    ?     . .
C(48)     C(50)     2.90(1)     ?     . .
C(48)     C(90)     2.918(9)    ?     . .
C(48)     C(96)     2.474(9)    ?     . .
C(49)     C(93)     2.49(1)     ?     . .
C(50)     C(53)     2.476(8)    ?     . .
C(50)     C(72)     3.48(1)     ?     . .
C(50)     C(75)     2.49(1)     ?     . .
C(50)     C(90)     2.47(1)     ?     . .
C(50)     C(96)     2.907(9)    ?     . .
C(51)     C(52)     2.477(7)    ?     . .
C(51)     C(65)     2.508(9)    ?     . .
C(51)     C(67)     2.914(8)    ?     . .
C(51)     C(68)     2.500(8)    ?     . .
C(51)     C(71)     2.502(8)    ?     . .
C(51)     C(82)     2.927(9)    ?     . .
C(51)     C(101)    3.521(9)    ?     . .
C(52)     C(65)     2.506(8)    ?     . .
C(52)     C(68)     3.509(8)    ?     . .
C(52)     C(71)     2.499(8)    ?     . .
C(52)     C(76)     2.907(8)    ?     . .
C(52)     C(82)     2.920(8)    ?     . .
C(52)     C(101)    2.474(9)    ?     . .
C(53)     C(72)     2.50(1)     ?     . .
C(53)     C(75)     2.495(9)    ?     . .
C(53)     C(90)     3.529(9)    ?     . .
C(53)     C(96)     2.925(8)    ?     . .
C(54)     C(84)     2.516(8)    ?     . .
C(54)     C(87)     2.52(1)     ?     . .
C(54)     C(89)     2.921(7)    ?     . .
C(54)     C(104)    2.464(8)    ?     . .
C(55)     C(60)     2.386(9)    ?     . .
C(55)     C(80)     2.76(1)     ?     . .
C(55)     C(102)    2.39(1)     ?     . .
C(56)     C(106)    2.40(1)     ?     . .
C(56)     C(107)    2.42(1)     ?     . .
C(56)     C(109)    2.785(9)    ?     . .
C(57)     C(61)     2.735(9)    ?     . .
C(57)     C(83)     2.35(1)     ?     . .
C(58)     C(63)     2.387(8)    ?     . .
C(58)     C(73)     2.760(8)    ?     . .
C(58)     C(81)     2.399(9)    ?     . .
C(59)     C(61)     2.378(9)    ?     . .
C(59)     C(77)     2.390(8)    ?     . .
C(59)     C(83)     2.752(9)    ?     . .
C(60)     C(74)     2.735(9)    ?     . .
C(60)     C(102)    2.399(9)    ?     . .
C(61)     C(77)     2.399(8)    ?     . .
C(62)     C(79)     2.50(1)     ?     . .
C(62)     C(91)     2.49(1)     ?     . .
C(62)     C(99)     2.51(1)     ?     . .
C(63)     C(81)     2.38(1)     ?     . .
C(63)     C(97)     2.733(9)    ?     . .
C(64)     C(78)     2.484(9)    ?     . .
C(64)     C(79)     2.93(1)     ?     . .
C(65)     C(67)     2.938(9)    ?     . .
C(65)     C(68)     2.482(8)    ?     . .
C(65)     C(71)     3.547(9)    ?     . .
C(65)     C(76)     2.931(9)    ?     . .
C(65)     C(101)    2.514(8)    ?     . .
C(67)     C(68)     2.908(9)    ?     . .
C(67)     C(76)     2.468(8)    ?     . .
C(67)     C(82)     2.487(9)    ?     . .
C(68)     C(71)     2.49(1)     ?     . .
C(68)     C(101)    2.491(9)    ?     . .
C(69)     C(84)     2.99(1)     ?     . .
C(69)     C(89)     2.557(9)    ?     . .
C(69)     C(92)     2.55(1)     ?     . .
C(70)     C(94)     2.87(1)     ?     . .
C(70)     C(113)    2.54(1)     ?     . .
C(70)     C(120)    2.38(1)     ?     . .
C(70)     C(122)    2.51(1)     ?     . .
C(71)     C(82)     2.92(1)     ?     . .
C(71)     C(101)    2.47(1)     ?     . .
C(72)     C(75)     2.496(9)    ?     . .
C(72)     C(90)     2.47(1)     ?     . .
C(73)     C(97)     2.349(9)    ?     . .
C(74)     C(80)     2.36(1)     ?     . .
C(75)     C(90)     2.492(9)    ?     . .
C(75)     C(96)     2.914(9)    ?     . .
C(76)     C(82)     2.48(1)     ?     . .
C(76)     C(101)    2.90(1)     ?     . .
C(78)     C(91)     2.929(9)    ?     . .
C(78)     C(99)     2.92(1)     ?     . .
C(79)     C(91)     3.54(1)     ?     . .
C(79)     C(99)     2.50(1)     ?     . .
C(84)     C(104)    2.49(1)     ?     . .
C(85)     C(118)    2.47(2)     ?     . .
C(85)     C(119)    2.51(1)     ?     . .
C(85)     C(124)    2.95(1)     ?     . .
C(86)     C(100)    2.49(1)     ?     . .
C(86)     C(103)    2.50(1)     ?     . .
C(86)     C(108)    2.90(1)     ?     . .
C(87)     C(104)    2.508(9)    ?     . .
C(88)     C(112)    2.41(1)     ?     . .
C(88)     C(118)    2.85(2)     ?     . .
C(88)     C(121)    2.53(2)     ?     . .
C(88)     C(124)    2.48(1)     ?     . .
C(89)     C(92)     2.489(9)    ?     . .
C(91)     C(99)     2.49(1)     ?     . .
C(92)     C(104)    2.89(1)     ?     . .
C(94)     C(98)     2.45(1)     ?     . .
C(94)     C(123)    2.46(1)     ?     . .
C(95)     C(107)    2.72(1)     ?     . .
C(95)     C(109)    2.35(1)     ?     . .
C(95)     C(117)    2.35(1)     ?     . .
C(98)     C(122)    2.94(1)     ?     . .
C(98)     C(123)    2.54(1)     ?     . .
C(100)    C(103)    2.49(1)     ?     . .
C(100)    C(105)    2.94(1)     ?     . .
C(105)    C(108)    2.49(1)     ?     . .
C(106)    C(107)    2.33(1)     ?     . .
C(106)    C(117)    2.70(1)     ?     . .
C(108)    C(114)    2.50(1)     ?     . .
C(109)    C(117)    2.37(1)     ?     . .
C(110)    C(115)    2.34(2)     ?     . .
C(110)    C(116)    3.57(1)     ?     . .
C(112)    C(124)    2.43(2)     ?     . .
C(113)    C(122)    2.49(1)     ?     . .
C(113)    C(123)    2.95(1)     ?     . .
C(118)    C(119)    2.47(2)     ?     . .
C(119)    C(121)    2.94(2)     ?     . .
C(120)    C(122)    2.44(1)     ?     . .
C(121)    C(124)    2.49(2)     ?     . .

#==============================================================================

# Additional structures and associated data_? identifiers
# should be added at this point if there is more than one 
# structure analysis in the CIF.

#==============================================================================

#     End of CIF

#==============================================================================
